# Supplementary material for: ROC and confusion analysis of structure comparison methods identify the main causes of divergence from manual protein classification
Source: PubMed Central journal article supplement (PMC1513609; doi:10.1186/1471-2105-7-206), 2006-04-13
Supplement: 1471-2105-7-206-S1.pdf [file 1471-2105-7-206-S1.pdf]

# VAST-Class-A----

QUERY FOLD

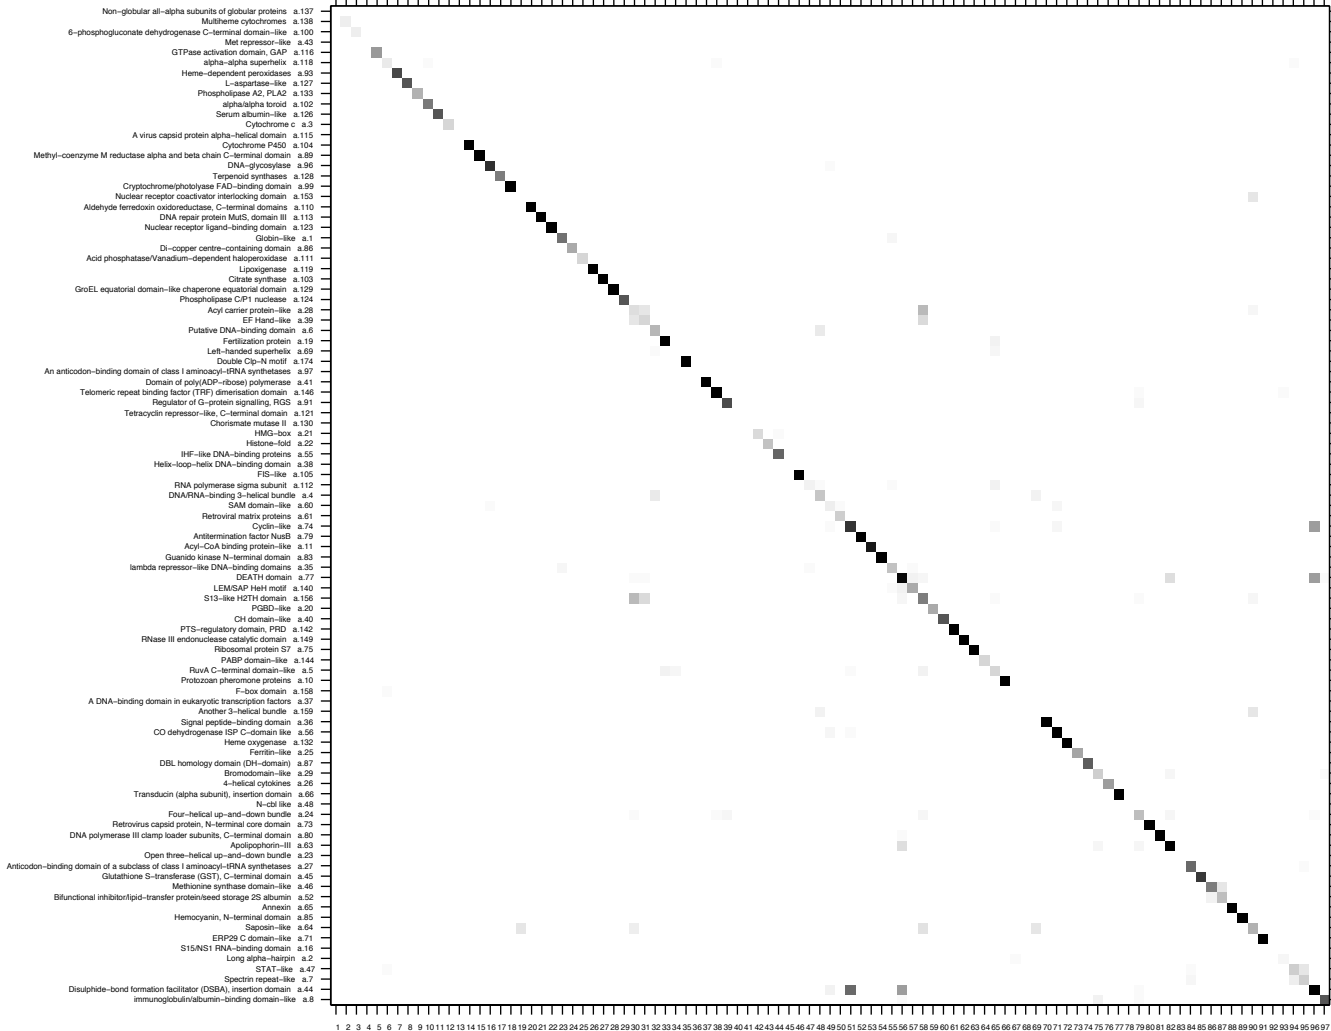

TARGET FOLD

# VAST-Class-B----

QUERY FOLD

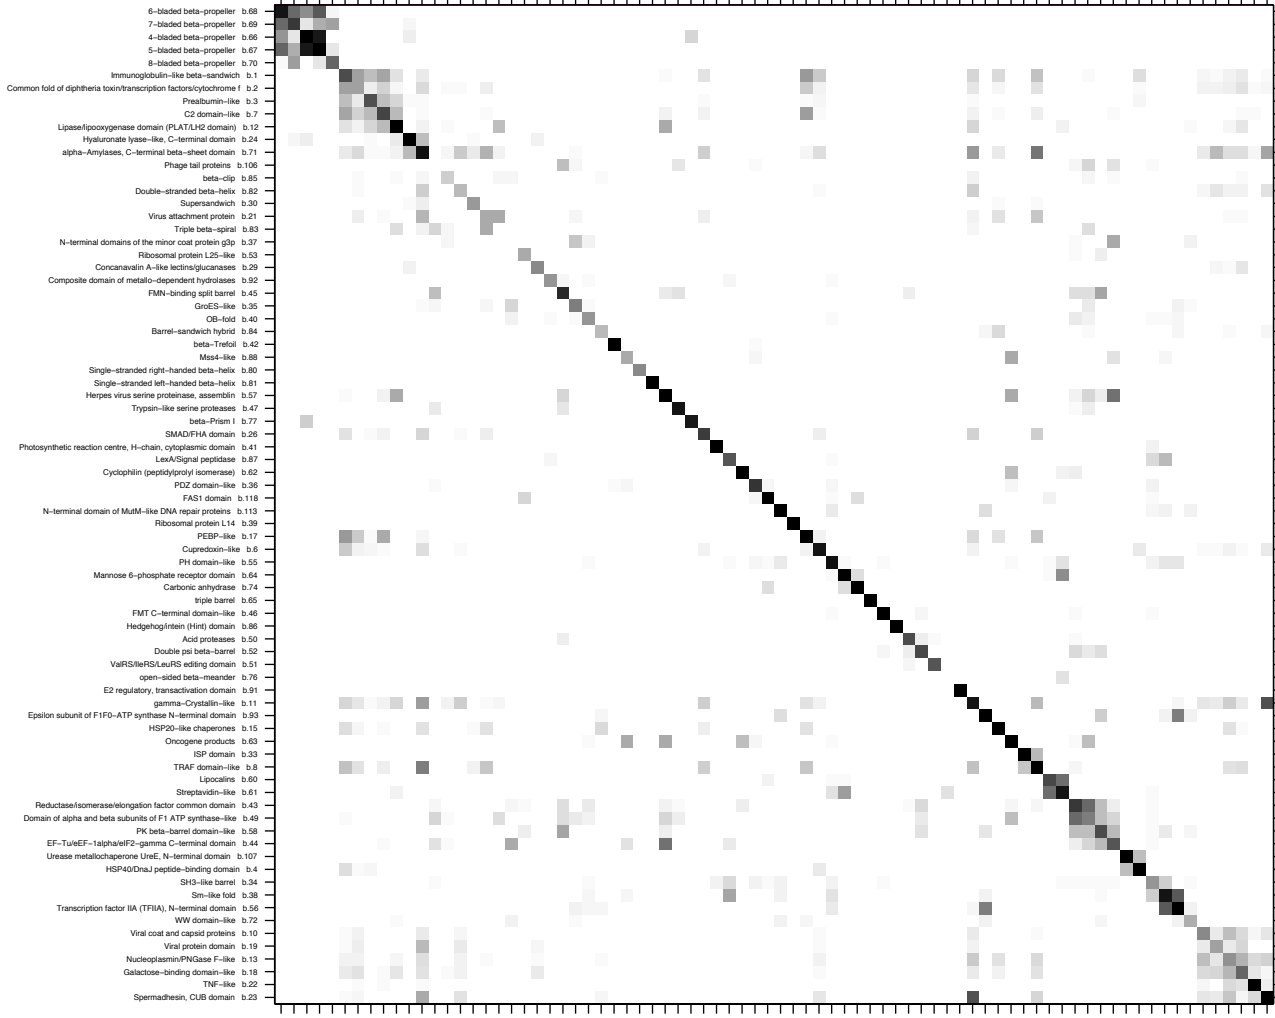

98 99 100 101 102 103 104 105 106 107 108 109 110 111 112 113 114 115 116 117 118 119 120 121 122 123 124 125 126 127 128 129 130 131 132 133 134 135 136 137 138 139 140 141 142 143 144 145 146 147 148 149 150 151 152 153 154 155 156 157 158 159 160 161 162 163 164 165 166 167 168 169 170 171 172 173 174 175

TARGET FOLD

# VAST-Class-C----

QUERY FOLD

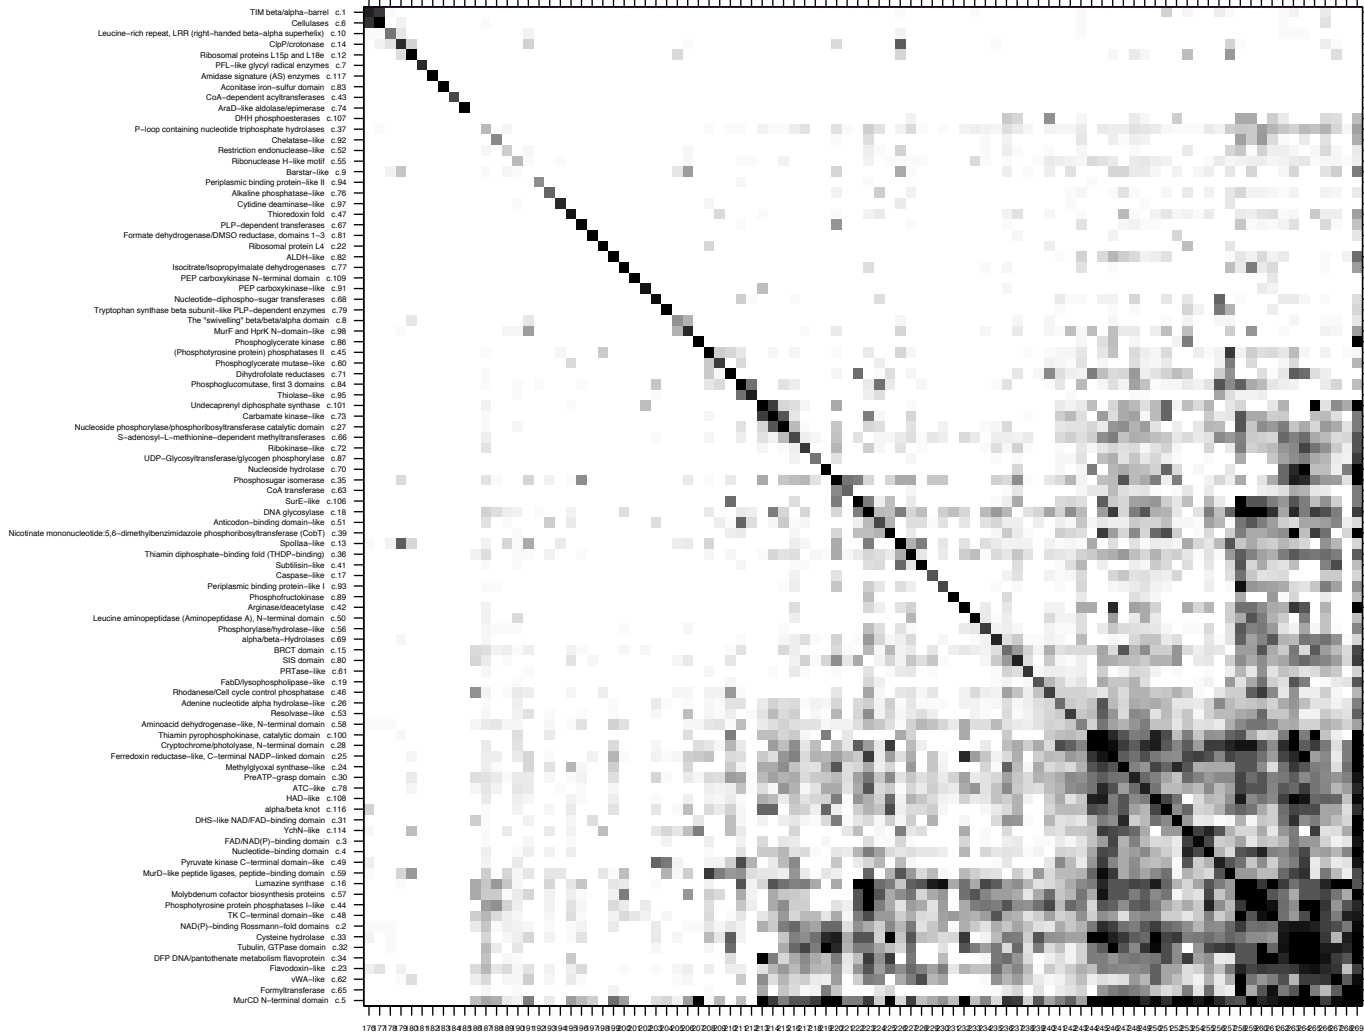

TARGET FOLD

# VAST-Class-D----

QUERY FOLD

- ATP-grasp d.140
- SAICAR synthase-like d.142
- Protein kinase-like PK-like d.104
- Class II aaRS and biotin synthetases d.104
- ATPase domain of HSP90 chaperone/DNA topoisomerase II/histone kinase d.122
- Ribosomal protein S5 domain 2-like d.14
- CO dehydrogenase flavoprotein C-domain-like d.81
- NH hydroxylase-like d.153
- ADP-ribosylation d.166
- Non-globular alpha-beta subunits of globular proteins d.184
- Htr-Me lyase endonucleases d.4
- Cytosine proteases d.4
- Protein-like d.52
- PF3C-like d.170
- FKBP-like d.26
- RPBS-like RNA polymerase subunit d.2
- Lysozyme-like d.2
- Bacillus cholesterase esterase-like d.78
- Glyceraldehyde-3-phosphate dehydrogenase-like C-terminal domain d.81
- C-type lectin-like d.108
- Glyoxalase/bleomycin resistance protein/Dihydroxyphenyl glyoxylase d.52
- Profilin-like d.110
- Cystatin-like d.17
- beta-hairpin-alpha-hairpin repeat d.211
- DNA binding requiring enzymes d.53
- Argininosuccinate synthetase C-terminal domain d.210
- Molybdenum cofactor-binding domain d.133
- Nucleic acid d.113
- ADC synthase d.181
- FAD-binding domain d.177
- Fibrinogen C-terminal domain-like d.145
- Epitope deformation d.167
- Nitric oxide (NO) synthase oxygenase domain d.14
- Ribonuclease RH-like d.124
- Lactate & malate dehydrogenase-like C-terminal domain d.185
- LuxGMPX-like metallohydrolase d.185
- YnfR-like d.115
- Ribosome inactivating proteins (RIP) d.166
- Phospholipase structure d.136
- Methyl-hydroxylase/oxidoreductase d.157
- Acyl-CoA N-acyltransferase-like d.108
- Gelsolin-like d.109
- Thymidylate synthase/dCMP hydroxymethylase d.112
- Succinate dehydrogenase/fumarate reductase flavoprotein, catalytic subunit d.168
- Rubisco small subunit d.73
- DNA comp. d.111
- Fe,Mn superoxide dismutase (SOD) C-terminal domain d.44
- N-acetylmuramoyl-L-alanine amidase-like d.118
- Protein, beta/alpha-protein d.126
- Send carrier protein, SC1 d.106
- Monooxygenase (hydroxylase) regulatory protein d.137
- MuB N-terminal domain-like d.75
- Ribosomal protein L3 d.77
- Penicillin binding protein direction domain d.175
- Multidrug efflux transporter AcrB TokC docking domain, DN and LC subdomains d.223
- Phosphotransferase/arsen transport protein d.112
- Aromatic aminoacid monooxygenases, catalytic and oligomerization domain d.178
- beta-Grasp (ubiquitin-like) d.15
- Alpha-1 RNA-binding motif d.66
- Cytochrome b5 d.120
- DOZ domain d.42
- PX domain d.189
- SipB d.201
- Microbial ribonucleases d.21
- Catalase/peroxyoxidase-like d.24
- Diaminopimelate epimerase d.21
- RNA A-like d.2
- SH2-like d.93
- RIP-like d.88
- ssDNA-binding/transcriptional regulator domain d.18
- RNA bacteriophage capsid protein d.85
- SAND domain-like d.217
- LS-like d.8
- Polynucleotide phosphorylase/guanosine pentaphosphate synthase (PNPase/GPS1) domains 2 and 3 d.101
- MHC antigen-recognition domain d.18
- Bacterial permeability-increasing protein, BPI d.83
- Glutamine synthase/glutamate kinase d.128
- Substrate-binding domain of HMG-CoA reductase d.139
- Secretion chaperone-like d.188
- LS N-domain-like d.100
- HIT-like d.13
- Methionine synthase activation domain-like d.173
- NADH oxidase/flavin reductase d.90
- Pron-like d.6
- Transcription factor NusA, N-terminal domain d.202
- Origin of replication - Nucleoid-associated protein d.218
- Protein dimerization domain d.10
- Hedgehog/DD-peptidase d.65
- RIF/RNA synthetase inhibitor domain-like d.18
- Insert subdomain of RNA polymerase alpha subunit d.181
- TGF- $\alpha$  C-terminal domain d.212
- CidA8 domain 2-like d.31
- Elongation factor Ts (EF-Ts) dimerization domain d.43
- T-rod d.96
- Ribosomal protein L30A-like d.10
- DNA-binding domain d.10
- RPD3-like d.50
- Sulfite reductase hemoprotein (SRP), small subunit d.18
- USC-like d.20
- N domain of copper amine oxidase-like d.111
- PR-1-like d.111
- MTH198-like d.208
- Probable bacterial effector-binding domain d.60
- Ribosomal protein S3 d.140
- F3-like d.68
- 4'-phosphopantetheinyl transferase d.150
- GFP-like d.22
- Thioesterase/thiol ester dehydratase-epimerase d.98
- FAD-linked reductases, C-terminal domain d.18
- alpha/beta - Haemoglobin d.18
- Uridine diphospho-N-Acetylerythrovinylglucosamine reductase, MuB, C-terminal domain d.146
- Transition initiation factor, Eff4 d.96
- DNAse I-like d.151
- Nitrite/N-carbamoyl-D-aminoo acid oxidoreductase d.160
- Metallo-dependent phosphatase d.159
- Ribosomal protein L2 and L1-like d.15
- Homing endonuclease-like d.86
- YggJ-like d.206
- Ynf1-like d.122
- Enolase N-terminal domain-like d.54
- Ribosomal protein L22 d.55
- Penicillin-binding protein 2a (pbp-2a), c-terminal domain d.11
- G-2 family of serine protease inhibitors d.60
- CBS-domain d.37
- S-adenosylmethionine synthetase d.130
- Taurine/taurine-ME d.80
- Alpha-lytic protease prodomain-like d.52
- Signal recognition particle aka RNA binding heterodimer, SRP94 d.46
- GDE1-intermediate domain-like d.56
- Cramin adenosine triphosphatase domain d.56
- Ribosomal protein L6 d.141
- HPV-like d.141
- Eukaryotic type KH-domain (eKH1-domain) d.51
- Femtoprotein-like d.58
- DCOH-like d.74
- Cop-like d.68

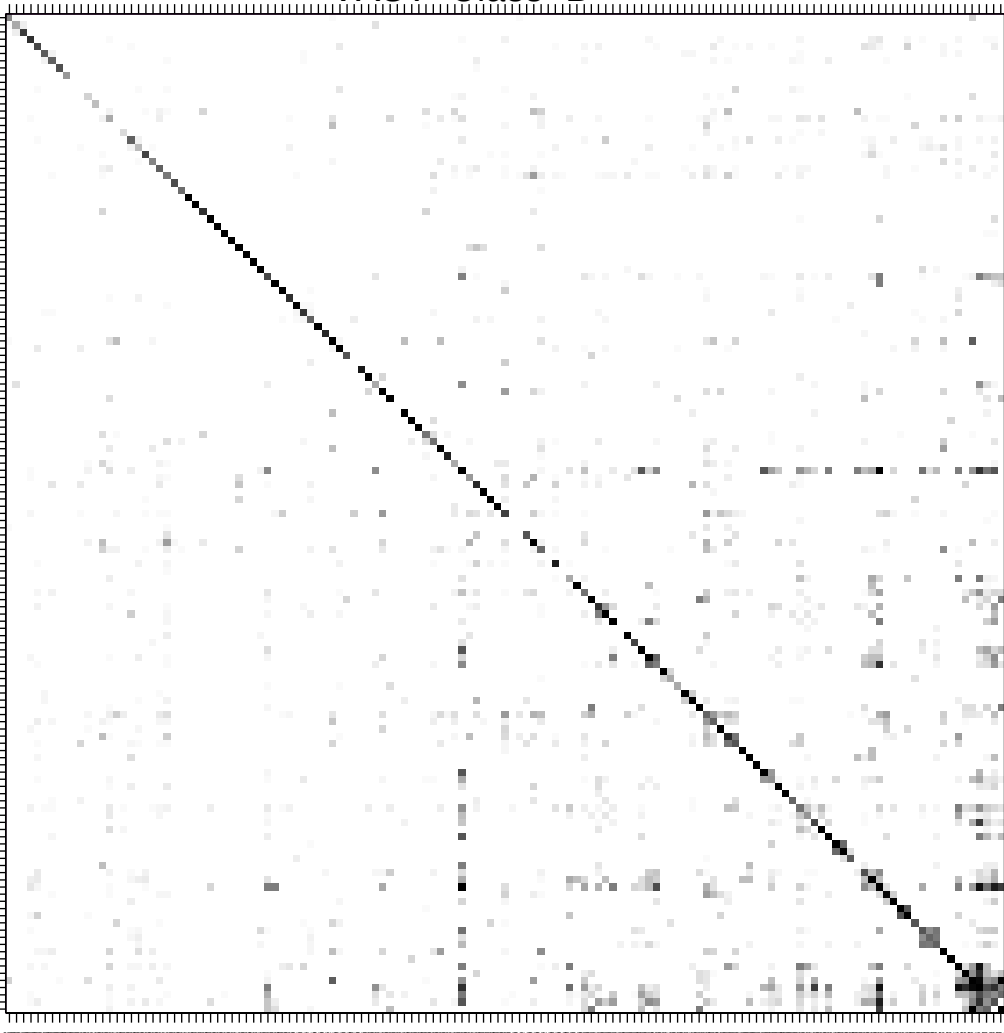

TARGET FOLD

# VAST-Class-E,F,G

QUERY FOLD

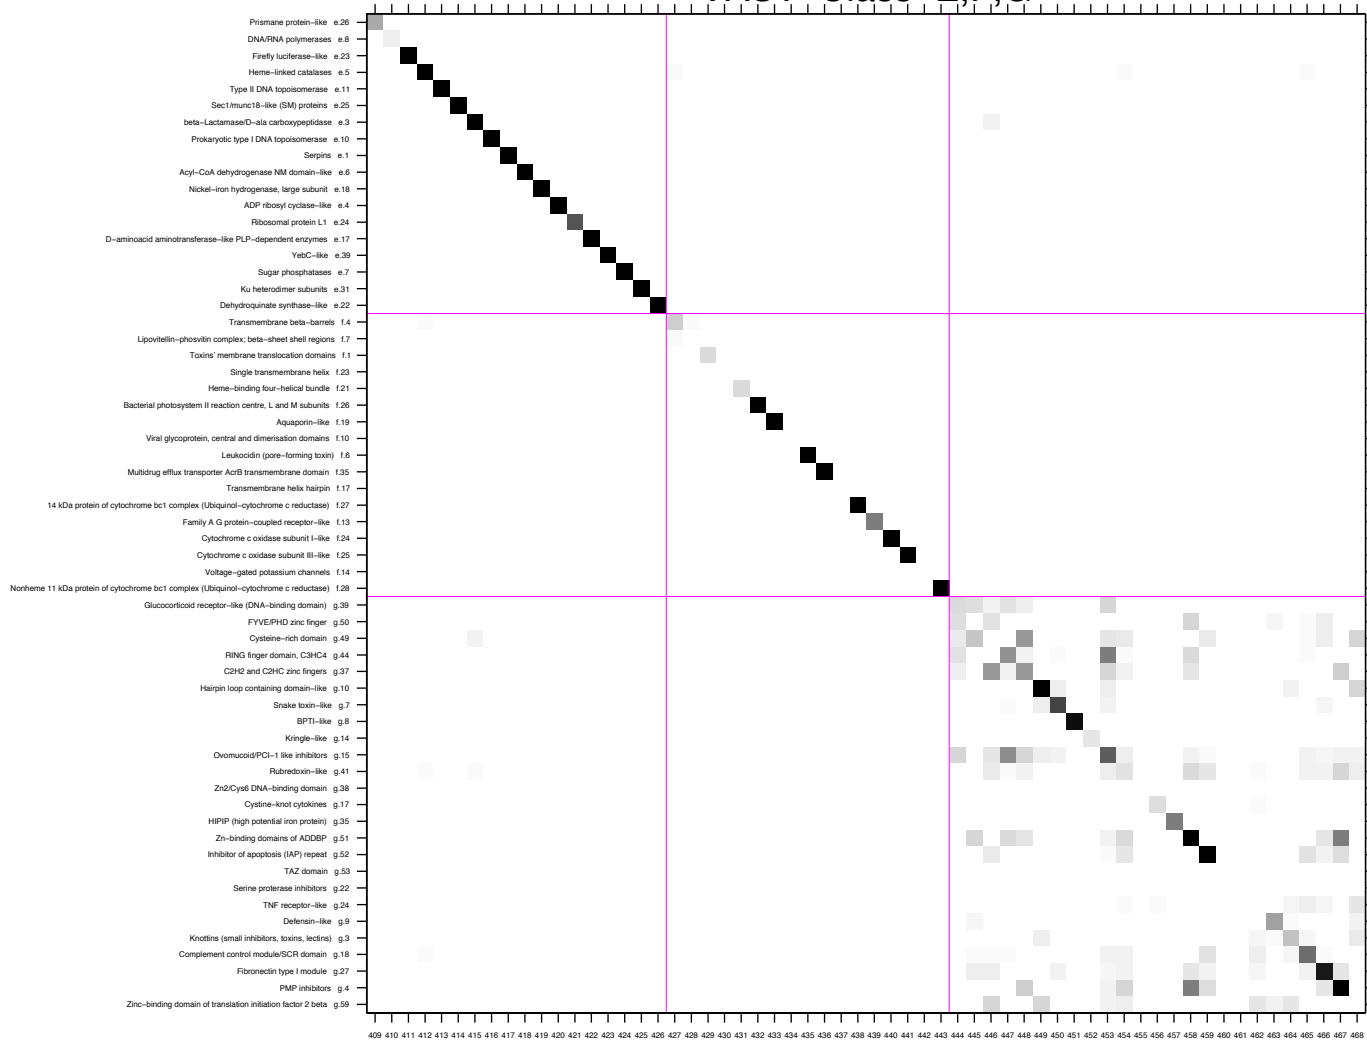

TARGET FOLD

# SHEBA-Class-A----

QUERY FOLD

- Non-globular all-alpha subunits of globular proteins a.137
- Multimeric cytochromes a.138
- 6-phosphogluconate dehydrogenase C-terminal domain-like a.100
  - Met repressor-like a.43
- GTPase activation domain, GAP a.116
  - alpha-alpha superhelix a.118
  - Heme-dependent peroxidases a.93
    - L-asparaginase-like a.127
  - Phospholipase A2, PLA2 a.133
    - alpha/alpha toroid a.102
    - Serum albumin-like a.126
      - Cytochrome c a.3
  - A virus capsid protein alpha-helical domain a.115
    - Cytochrome P450 a.104
- Methyl-coenzyme M reductase alpha and beta chain C-terminal domain a.89
  - DNA-glycosylase a.96
    - Terpenoid synthetases a.128
  - Cryptochrome/photolyase FAD-binding domain a.99
  - Nuclear receptor coactivator-interacting domain a.153
- Aldehyde ferredoxin oxidoreductase, C-terminal domains a.110
  - DNA repair protein MuS, domain III a.113
  - Nuclear receptor ligand-binding domain a.123
    - Globin-like a.1
  - D<sub>2</sub>-copper centre-containing domain a.86
- Acid phosphatase/Vanadum-dependent haloperoxidase a.111
  - Lipoxygenase a.119
  - Citrate synthase a.103
- GroEL equatorial domain-like chaperone equatorial domain a.129
  - Phospholipase C/P1 nuclease a.124
    - Acyl carrier protein-like a.26
    - EF-Hand-like a.26
      - Putative DNA-binding domain a.6
  - Fertilization protein a.19
    - Left-handed superhelix a.69
    - Double C<sub>2</sub>-N motif a.174
- An anticodon-binding domain of class I aminoacyl-tRNA synthetases a.97
  - Domain of poly(ADP-ribose) polymerase a.41
- Telomeric repeat binding factor (TRF) dimerisation domain a.146
  - Regulator of G-protein signaling, RGS a.91
- Tetracycline repressor-like, C-terminal domain a.121
  - Chromatinase II a.130
    - HMS-box a.21
    - Histone-fold a.22
    - HF-like DNA-binding proteins a.55
  - Helix-loop-helix DNA-binding domain a.38
    - FIS-like a.105
  - RNA polymerase sigma subunit a.112
  - DNA/RNA-binding 3-helical bundle a.4
    - SAM domain-like a.60
  - Retroviral matrix proteins a.61
    - Cylin-like a.74
  - Antitermination factor NusB a.79
  - Acyl-CoA binding protein-like a.11
    - Guanylate kinase N-terminal domain a.83
  - Iambda repressor-like DNA-binding domains a.35
    - DEATH domain a.77
    - LEM/SAP HEH motif a.140
    - S13-like H2H domain a.156
    - PGSD-like a.20
    - CH domain-like a.40
  - PTS-regulatory domain, PRD a.142
  - RNase II endonuclease catalytic domain a.149
    - Ribosomal protein S7 a.75
    - PABP domain-like a.144
  - RuvA C-terminal domain-like a.5
    - Protozoan pheromone proteins a.10
    - F-box domain a.156
  - A DNA-binding domain in eukaryotic transcription factors a.97
    - Another 3-helical bundle a.159
  - Signal peptide-binding domain a.36
  - CO dehydrogenase (SC) C-domain like a.36
    - Heme oxygenase a.132
    - Ferritin-like a.25
  - DBL homology domain (DH-domain) a.87
    - Bromodomain-like a.29
    - 4-helical cytokines a.26
  - Transducin (alpha subunit), insertion domain a.66
    - N-ctf-like a.48
  - Four-helical up-and-down bundle a.24
  - Retrovirus capsid protein, N-terminal core domain a.73
  - DNA polymerase III clamp loader subunits, C-terminal domain a.80
    - Apoptophen-III a.63
  - Open three-helical up-and-down bundle a.23
  - Anticodon-binding domain of a subclass of class I aminoacyl-tRNA synthetases a.27
    - Glutathione S-transferase (GST), C-terminal domain a.45
    - Methionine synthase domain-like a.46
  - Bifunctional inhibitor/lipid-transfer protein/seed storage 2S albumin a.52
    - Annexin a.65
    - Hemocyanin, N-terminal domain a.85
      - Sapoptin-like a.64
    - ERP29 C domain-like a.71
    - S15NS1 RNA-binding domain a.16
      - Long alpha-hairpin a.2
      - STAT-like a.47
    - Spectrin repeat-like a.7
  - Disulphide-bond formation facilitator (DSB), insertion domain a.44
    - Immunoglobulin/albumin-binding domain-like a.8

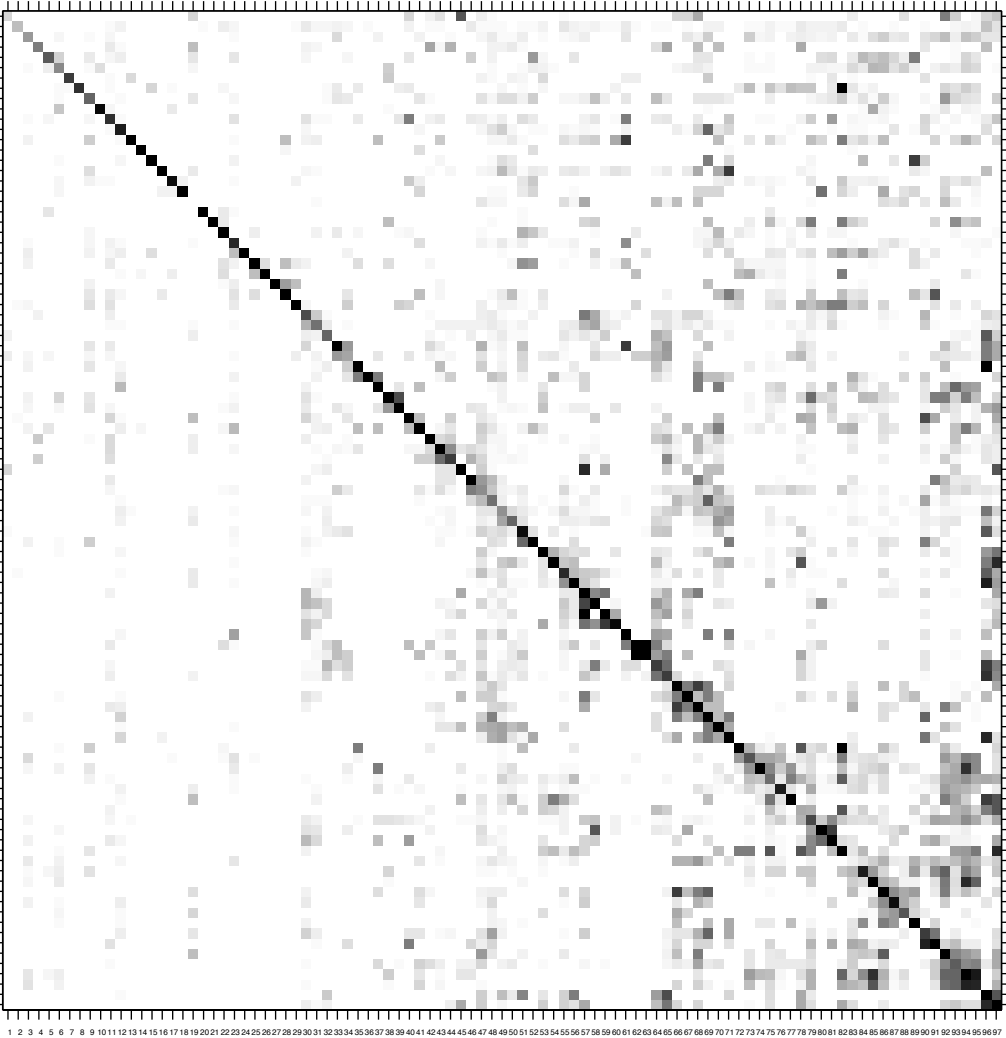

TARGET FOLD

# SHEBA-Class-B----

QUERY FOLD

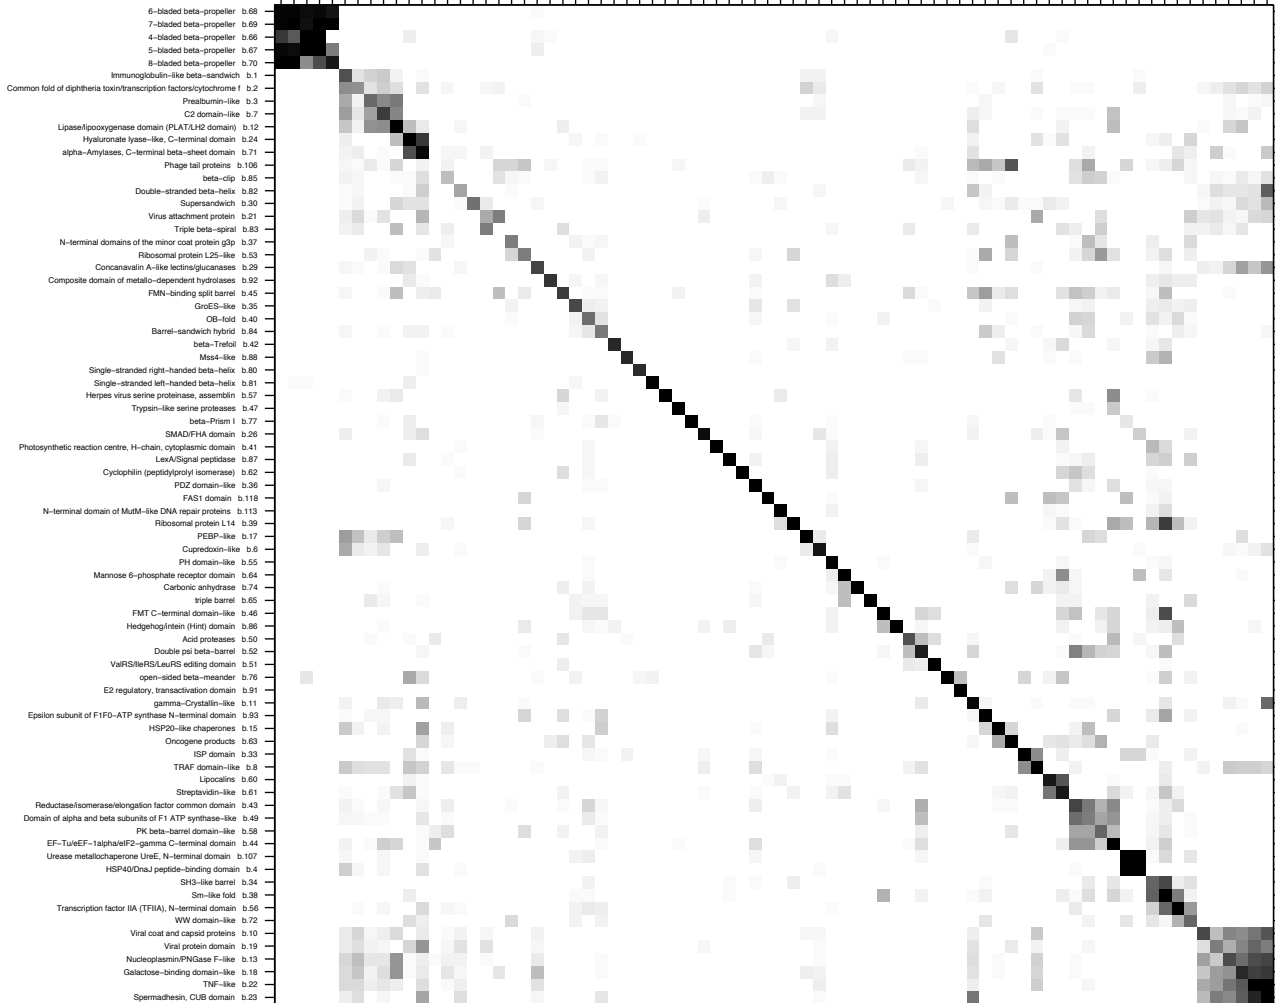

99 99 10001102103104105106107108109110111112113114115116117118119120121122123124125126127128129130131132133134135136137138139140141142143144145146147148149150151152153154155156157158159160161162163164165166167168169170171172173174175

TARGET FOLD

# SHEBA-Class-C----

QUERY FOLD

- TIM beta/alpha-barrel c.1
- Cellulases c.6
- Leucine-rich repeat, LRR (right-handed beta-alpha superhelix) c.10
- Csp/Concanase c.14
- Ribosomal proteins L15g and L15e c.19
- PFL-like glycol radical enzymes c.7
- Amidase signature (AS) enzymes c.117
- Acetate non-sulfur domain c.83
- CoA-dependent acyltransferases c.43
- AraD-like aldolase/epimerase c.74
- DHAP phosphotransferases c.107
- P-loop containing nucleotide triphosphate hydrolases c.37
- Chelatase-like c.92
- Restriction endonuclease-like c.52
- Ribonuclease H-like motif c.55
- Barstar-like c.9
- Periplasmic binding protein-like II c.94
- Alkaline phosphatase-like c.76
- Cytidine desaminase-like c.97
- Thiazosin fold c.47
- PLP-dependent transferases c.67
- Formate dehydrogenase/DMSO reductase, domains 1-3 c.81
- Ribosomal protein-L22 c.22
- ALDH-like c.82
- Isocitrate/isocitrylmalate dehydrogenases c.77
- PEP carboxylase N-terminal domain c.109
- PEP carboxylase-like c.91
- Nucleotide-diphospho-sugar transferases c.68
- Tryptophan synthase beta subunit-like PLP-dependent enzymes c.78
- The "swivelling" beta/beta/alpha domain c.8
- MuF and HprK N-domain-like c.98
- Phosphoglycerate kinase c.86
- (Phosphotyrosine protein) phosphatases II c.45
- Phosphoglycerate mutase-like c.60
- Dihydrofolate reductases c.71
- Phosphoglucomutase, first 3 domains c.84
- Thioase-like c.95
- Undecaprenyl diphosphate synthase c.101
- Carbamate kinase-like c.73
- Nucleoside phosphorylase/phosphoribosyltransferase catalytic domain c.27
- S-adenosyl-L-methionine-dependent methyltransferases c.66
- Ribokinase-like c.72
- UDP-Glycosyltransferase/glycogen phosphorylase c.87
- Nucleoside hydrolase c.70
- Phosphosugar isomerase c.36
- CoA transferase c.63
- SurE-like c.106
- DNA glycoylase c.18
- Anticodon-binding domain-like c.51
- Nicotinate mononucleotide:5,6-dimethylbenzimidazole phosphoribosyltransferase (CoT) c.39
- Spolaa-like c.13
- Thiamin diphosphate-binding fold (THDP-binding) c.36
- Subtilisin-like c.41
- Caspase-like c.17
- Periplasmic binding protein-like I c.93
- Phosphofrucoylase c.89
- Agmatase/deacetylase c.42
- Leucine aminopeptidase (Aminopeptidase A), N-terminal domain c.50
- Phosphorylase/hydrolase-like c.56
- alpha/beta-Hydrolases c.69
- BRCT domain c.15
- SIS domain c.80
- PRTase-like c.61
- FabD/lysophospholipase-like c.19
- Rhodanese/Cell cycle control phosphatase c.46
- Adenine nucleotide alpha hydrolase-like c.26
- Resolvase-like c.53
- Aminoacid dehydrogenase-like, N-terminal domain c.58
- Thiamin pyrophosphokinase, catalytic domain c.100
- Cryptochrome/photolyase, N-terminal domain c.28
- Ferredoxin reductase-like, C-terminal NADP-linked domain c.25
- Methylglyoxal synthase-like c.24
- PreATP-grasp domain c.30
- ATC-like c.78
- HSD-like c.108
- alpha/beta knot c.116
- DHS-like NAD/FAD-binding domain c.31
- YohN-like c.114
- FAD/NAD(P)-binding domain c.3
- Nucleotide-binding domain c.4
- Pyruvate kinase C-terminal domain-like c.49
- MurD-like peptide ligases, peptide-binding domain c.59
- Lumazine synthase c.16
- Molybdenum cofactor biosynthesis proteins c.57
- Phosphotyrosine protein phosphatases I-like c.44
- TK C-terminal domain-like c.48
- NAD(P)-binding Rossmann-fold domains c.2
- Cysteine hydrolase c.33
- Tubulin, GTPase domain c.30
- DFP DNA/pantothenate metabolism flavoprotein c.34
- Flavodoxin-like c.23
- vWA-like c.62
- Formyltransferase c.65
- MurCD N-terminal domain c.5

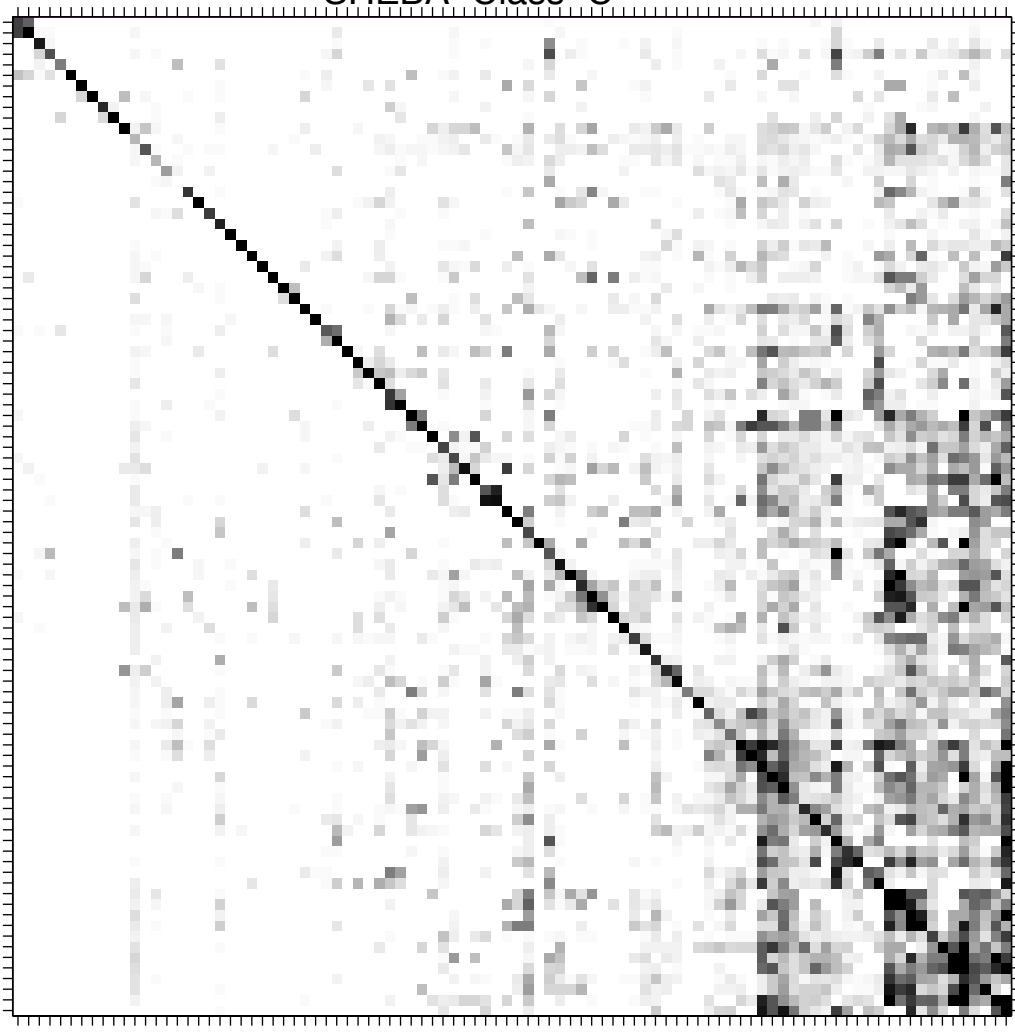

TARGET FOLD



# SHEBA-Class-D----

QUERY FOLD

- ATP-grasp d:140
- SAICAR synthase-like d:142
- Protein kinase-like PK-like d:143
- Class II aaRS and biotin synthetases d:104
- ATPase domain of HSP90 chaperone/DNA topoisomerase/histidine kinase d:122
- Ribosomal protein S5 domain-2-like d:14
- CO dehydrogenase ferredoxin C-domain-like d:87
- NH hydroxylase-like d:153
- ATP-hydrolysis d:166
- Non-globular alpha-beta subunits of globular proteins d:184
- Htr-Me lyase endonucleases d:4
- Cytoskeletal d:52
- Proton-like d:170
- FKBP-like d:26
- RPBS-like RNA polymerase subunit d:2
- Lysozyme-like d:2
- Bacillus cholesteral mutase-like d:78
- Glyceraldehyde-3-phosphate dehydrogenase-like, C-terminal domain d:81
- C-type lectin-like d:169
- Glyoxalase/leucine resistance protein/Dihydroxyphenyl glyoxylase d:52
- Profilin-like d:110
- Cystatin-like d:17
- beta-hairpin-alpha-hairpin repeat d:211
- DNA binding-requiring enzymes d:53
- Argininosuccinate synthetase, C-terminal domain d:210
- Molybdenum cofactor-binding domain d:133
- Nucleic d:113
- ADC synthase d:181
- FAD-binding domain d:177
- Fibrinogen C-terminal domain-like d:145
- Epoxide deformylase d:167
- Nitric oxide (NO) synthase oxygenase domain d:174
- Ribonuclease Rb-like d:124
- Lactate & malate dehydrogenase, C-terminal domain d:165
- Luc/GMPP-like metaldehyde d:185
- Luc/GMPP-like metaldehyde d:185
- Ribosome inactivating proteins (RIP) d:156
- Phospholipase d:156
- Methyl-hydroxylase/oxoaldehyde d:157
- Acyl-CoA N-acyltransferase-like d:108
- Gelsolin-like d:109
- Thymidylate synthase/UMP hydroxymethylase d:111
- Succinate dehydrogenase/fumarate reductase havoquinone, catalytic d:168
- Rubisco, small subunit d:73
- DNA comp. d:511
- Fe,Mn superoxide dismutase (SOD), C-terminal domain d:44
- N-acetylmuramoyl-L-alanine amidase-like d:118
- Perlecan, beta(1)alpha-propeptide d:126
- Shed carrier protein, SC1 d:106
- Monooxygenase (hydroxylase) regulatory protein d:137
- MuB N-terminal domain-like d:75
- Ribosomal protein L3 d:77
- Multidrug efflux transporter AcrB TokC docking domain, DN and LC subdomain d:175
- Phosphotransferase/arsen transport protein d:112
- Aromatic aminoacid monooxygenases, catalytic and oligomerization domain d:112
- beta-grasp tubiquitin-like d:15
- Alpha-1 RNA-binding motif d:66
- Cytochrome b5 d:120
- DOX domain d:42
- PX domain d:189
- Spiral d:201
- Microbial ribonucleases d:1
- Cristalin/serpinopropin d:21
- Diaminopimelate epimerase d:21
- RNase A-like d:2
- SP2-like d:53
- SRP-like d:88
- ssDNA-binding/transcriptional regulator domain d:18
- RNA bacteriophage capsid protein d:85
- SAND domain-like d:217
- LS-like d:4
- Polynucleotide phosphorylase/guanosine pentaphosphate synthase (PNPase/GPS), domains 2 and 5 d:101
- Bacterial antigen-recognition domain d:18
- MHC antigen-presenting protein, I d:83
- Glutamine synthase/glutathione kinase d:128
- Substrate-binding domain of HMG-CoA reductase d:159
- Secretion chaperone-like d:186
- LS N-domain-like d:100
- HIT-like d:13
- Methionine synthase activation domain-like d:173
- NADH oxidase/flavin reductase d:90
- Proin-like d:6
- Transcription factor NuxA, N-terminal domain d:202
- Origin of replication - Nucleolytic/transferase d:218
- in vitro Shikimate d:218
- Hedgehog/DD-peptidase d:65
- RIF/RNA synthetase additional domain d:18
- Insert subdomain of RNA polymerase alpha subunit d:181
- TDK/Grd C-terminal domain d:212
- Elongation factor Ts (EF-Ts), dimerization domain d:31
- CidA8 domain-2-like d:43
- T-fog d:96
- Ribosomal protein L30a, 7e d:59
- DNA-binding domain d:10
- SPSD-like d:50
- Sulfite reductase hemoprotein (SRH), domain 2 d:134
- SPSD-like d:50
- N domain of copper amine oxidase-like d:20
- PR-1-like d:111
- MTH158-like d:208
- Probable bacterial effector-binding domain d:60
- Ribosomal protein S3 d:140
- F3-like d:68
- 4'-phosphopantetheinyl transferase d:150
- GFP-like d:22
- Thioesterase/thiol ester dehydratase-lysozyme d:98
- FAD-linked reductases, C-terminal domain d:18
- alpha(2)beta(2)-Hamm/haemolysin d:18
- Uridine diphospho-N-Acetylerydopyruvylglucosamine reductase, MuB, C-terminal domain d:146
- Transition factor-like effector d:96
- DNAse I-like d:151
- Nitriase-N-carbamoyl-D-aminooacid amidohydrolyase d:160
- Metallo-dependent phosphatases d:159
- Ribosomal proteins L2 and L16 d:15
- Homing endonuclease-like d:15
- YggJ-like d:206
- YggJ-like d:206
- Enolase N-terminal domain-like d:54
- Ribosomal protein L22 d:54
- Penicillin-binding protein 2a (pbp-2a), c-terminal domain d:11
- G-2 family of serine protease inhibitors d:60
- CBS-domain d:37
- S-adenosylmethionine synthetase d:130
- Trautnerase/MIF d:80
- Alpha-lytic protease prodomain-like d:82
- Signal recognition particle aka RNA binding heterodimer, SRP94 d:46
- GOE1-intermediate domain like d:56
- Cramin adalain superfamily domain d:106
- Ribosomal protein L6 d:141
- HPV-like d:141
- Eukaryotic type KH-domain (eKH1-domain) d:51
- Femtoprotein-like d:58
- DCOH-like d:74
- Cop-like d:68

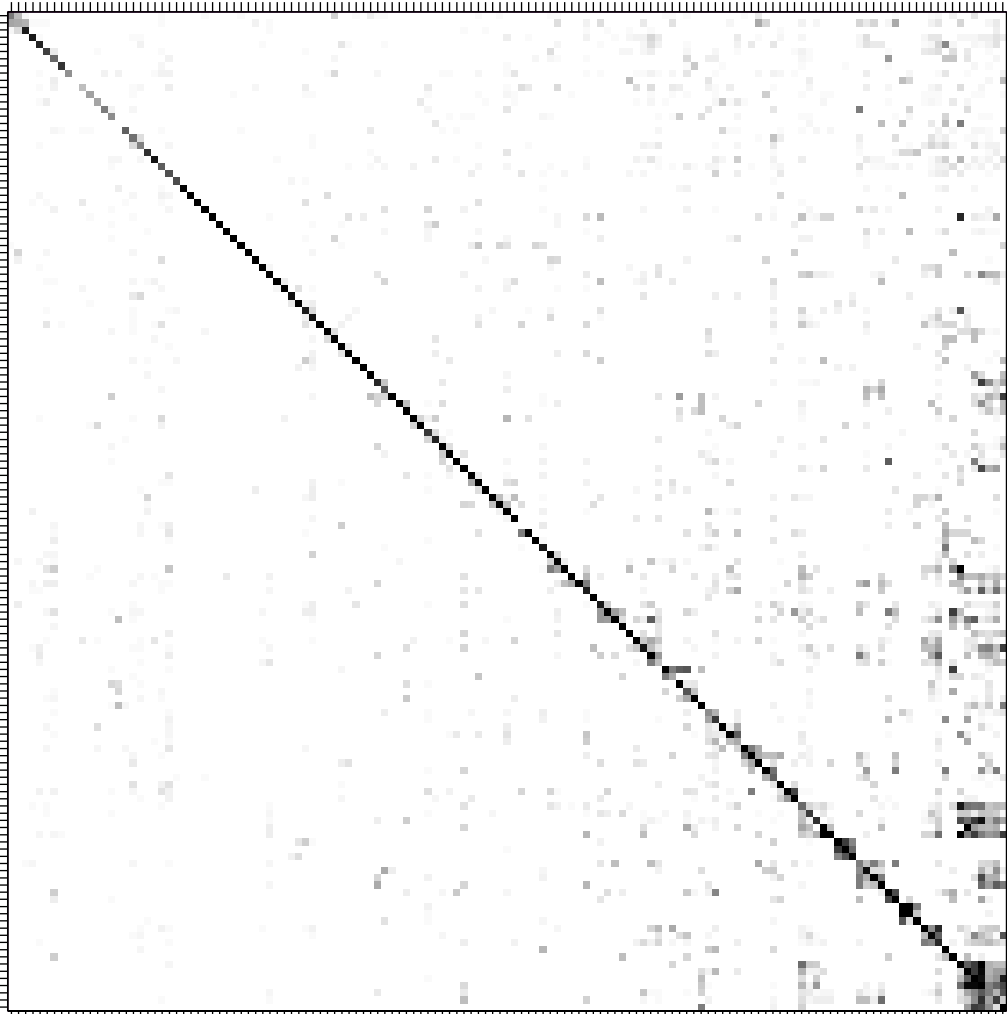

TARGET FOLD

# SHEBA-Class-E,F,G

QUERY FOLD

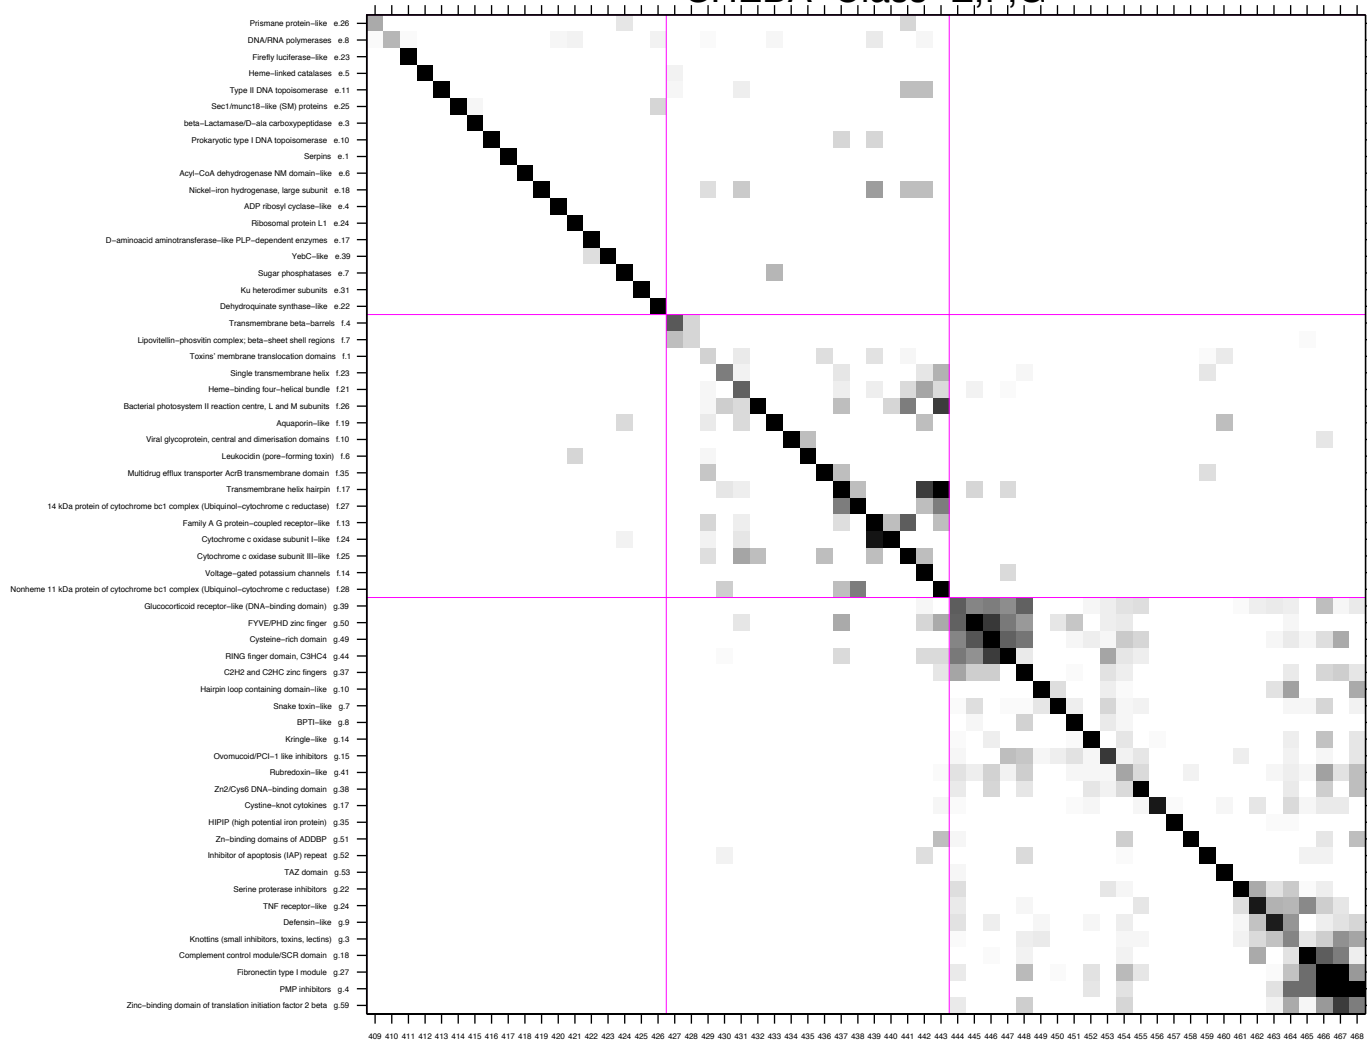

TARGET FOLD
