# Supplementary material for: ROC and confusion analysis of structure comparison methods identify the main causes of divergence from manual protein classification
Source: PubMed Central journal article supplement (PMC1513609; doi:10.1186/1471-2105-7-206), 2006-04-13
Supplement: 1471-2105-7-206-S2.pdf [file 1471-2105-7-206-S2.pdf]

Table 3. True Positive Rates at 1% False Positive Rate, for VAST and SHEBA, for 468 SCOP Folds in the order of the Heat Map.

| $i$ | Class Fold | $N_i$ | TPR VAST | TPR SHEBA | Fold Name                                                          | Fold Description                                                                                              |
|-----|------------|-------|----------|-----------|--------------------------------------------------------------------|---------------------------------------------------------------------------------------------------------------|
| 1   | a.137      | 3     | 0.000    | 0.167     | Non-globular all-alpha subunits of globular proteins               |                                                                                                               |
| 2   | a.138      | 17    | 0.077    | 0.257     | Multiheme cytochromes                                              | variable number of helices and little beta structure; not a true fold                                         |
| 3   | a.100      | 10    | 0.078    | 0.400     | 6-phosphogluconate dehydrogenase C-terminal domain-like            | multihelical; common core is formed around two long antiparallel helices related by (pseudo) twofold symmetry |
| 4   | a.43       | 2     | 0.000    | 0.500     | Met repressor-like                                                 | core: 4 helices; array of 2 hairpins, opened                                                                  |
| 5   | a.116      | 5     | 0.400    | 0.650     | GTPase activation domain, GAP                                      | multihelical                                                                                                  |
| 6   | a.118      | 51    | 0.082    | 0.467     | alpha-alpha superhelix                                             | multihelical; 2 (curved) layers: alpha/alpha; right-handed superhelix                                         |
| 7   | a.93       | 7     | 0.714    | 0.762     | Heme-dependent peroxidases                                         | multihelical; consists of two all-alpha domains                                                               |
| 8   | a.127      | 6     | 0.667    | 0.800     | L-aspartase-like                                                   | multihelical, consists of three all-alpha domains                                                             |
| 9   | a.133      | 5     | 0.300    | 0.600     | Phospholipase A2, PLA2                                             | common core: 2 helices, disulphide-linked, and a calcium-binding loop                                         |
| 10  | a.102      | 25    | 0.528    | 0.960     | alpha/alpha toroid                                                 | multihelical; up to seven alpha-hairpins are arranged in closed circular array                                |
| 11  | a.126      | 6     | 0.667    | 0.800     | Serum albumin-like                                                 | multihelical; one domain consists of two similar disulphide-linked subdomains                                 |
| 12  | a.3        | 32    | 0.158    | 0.877     | Cytochrome c                                                       | core: 3 helices; folded leaf, opened                                                                          |
| 13  | a.115      | 2     | 0.000    | 1.000     | A virus capsid protein alpha-helical domain                        | multihelical; three-helical bundle in the core is surrounded by non-conserved helices                         |
| 14  | a.104      | 12    | 1.000    | 1.000     | Cytochrome P450                                                    | multihelical                                                                                                  |
| 15  | a.89       | 2     | 1.000    | 1.000     | Methyl-coenzyme M reductase alpha and beta chain C-terminal domain | multihelical bundle; contains buried central helix                                                            |
| 16  | a.96       | 6     | 0.800    | 1.000     | DNA-glycosylase                                                    | multihelical; consists of two all-alpha domains                                                               |
| 17  | a.128      | 7     | 0.500    | 0.952     | Terpenoid synthases                                                | multihelical; core: 8 helices (C-J) are arranged in 2 parallel layers                                         |
| 18  | a.99       | 3     | 1.000    | 1.000     | Cryptochrome/photolyase FAD-binding domain                         | multihelical; consists of two all-alpha subdomains                                                            |
| 19  | a.153      | 2     | 0.000    | 0.000     | Nuclear receptor coactivator interlocking domain                   | 3 helices, non-globular array; forms interlocked heterodimers with its targets                                |
| 20  | a.110      | 2     | 1.000    | 1.000     | Aldehyde ferredoxin oxidoreductase, C-terminal domains             | multihelical; consists of two all-alpha domains                                                               |
| 21  | a.113      | 2     | 1.000    | 1.000     | DNA repair protein MutS, domain III                                | multihelical; consists of 2 all-alpha subdomains                                                              |
| 22  | a.123      | 11    | 1.000    | 1.000     | Nuclear receptor ligand-binding domain                             | multihelical; 3 layers or orthogonally packed helices                                                         |
| 23  | a.1        | 31    | 0.562    | 0.840     | Globin-like                                                        | core: 6 helices; folded leaf, partly opened                                                                   |

Table 3. True Positive Rates at 1% False Positive Rate, for VAST and SHEBA, for 468 SCOP Folds in the order of the Heat Map.

| $i$ | Class Fold | $N_i$ | TPR VAST | TPR SHEBA | Fold Name                                                         | Fold Description                                                                                                  |
|-----|------------|-------|----------|-----------|-------------------------------------------------------------------|-------------------------------------------------------------------------------------------------------------------|
| 24  | a.86       | 4     | 0.333    | 1.000     | Di-copper centre-containing domain                                | multihelical                                                                                                      |
| 25  | a.111      | 4     | 0.167    | 1.000     | Acid phosphatase/Vanadium-dependent haloperoxidase                | multihelical; core: 5-helical bundle; binds cofactor at the beginning of third helix                              |
| 26  | a.119      | 2     | 1.000    | 1.000     | Lipoxygenase                                                      | multihelical                                                                                                      |
| 27  | a.103      | 4     | 1.000    | 1.000     | Citrate synthase                                                  | multihelical; consists of two all-alpha domains                                                                   |
| 28  | a.129      | 2     | 1.000    | 1.000     | GroEL equatorial domain-like chaperone equatorial domain          | multihelical; 8 helices arranged in 2 parallel layers                                                             |
| 29  | a.124      | 3     | 0.667    | 1.000     | Phospholipase C/P1 nuclease                                       | multihelical                                                                                                      |
| 30  | a.28       | 9     | 0.139    | 0.694     | Acyl carrier protein-like                                         | 4 helices, bundle; helix 3 is shorter than others; up-and-down                                                    |
| 31  | a.39       | 41    | 0.163    | 0.548     | EF Hand-like                                                      | core: 4 helices; array of 2 hairpins, opened                                                                      |
| 32  | a.6        | 7     | 0.286    | 0.595     | Putative DNA-binding domain                                       | core: 3 helices; architecture is similar to that of the "winged helix" fold but topology is different             |
| 33  | a.19       | 2     | 1.000    | 1.000     | Fertilization protein                                             | core: 3 helices; bundle, closed, right-handed twist; up-and-down                                                  |
| 34  | a.69       | 5     | 0.000    | 0.350     | Left-handed superhelix                                            | core: 4-5 helices; bundle; left-handed superhelix                                                                 |
| 35  | a.174      | 2     | 1.000    | 1.000     | Double Clp-N motif                                                | multihelical; array                                                                                               |
| 36  | a.97       | 2     | 0.000    | 1.000     | An anticodon-binding domain of class I aminoacyl-tRNA synthetases | multihelical; consists of two all-alpha domains                                                                   |
| 37  | a.41       | 2     | 1.000    | 1.000     | Domain of poly(ADP-ribose) polymerase                             | core: 4 helices: bundle; unusual topology                                                                         |
| 38  | a.146      | 2     | 1.000    | 1.000     | Telomeric repeat binding factor (TRF) dimerisation domain         | multihelical; can be divided into an alpha-alpha superhelix domain and a long alpha-hairpin dimerisation domain   |
| 39  | a.91       | 5     | 0.700    | 1.000     | Regulator of G-protein signalling, RGS                            | multihelical; consists of two all-alpha subdomains                                                                |
| 40  | a.121      | 2     | 0.000    | 1.000     | Tetracyclin repressor-like, C-terminal domain                     | multihelical; interlocked (homo)dimer                                                                             |
| 41  | a.130      | 2     | 0.000    | 1.000     | Chorismate mutase II                                              | multihelical; core: 6 helices, bundle                                                                             |
| 42  | a.21       | 7     | 0.143    | 1.000     | HMG-box                                                           | 3 helices; irregular array                                                                                        |
| 43  | a.22       | 14    | 0.242    | 1.000     | Histone-fold                                                      | core: 3 helices; long middle helix is flanked at each end with shorter ones                                       |
| 44  | a.55       | 5     | 0.600    | 0.750     | IHF-like DNA-binding proteins                                     | core: 4 helices; bundle, partly opened, capped with a beta-sheet                                                  |
| 45  | a.38       | 2     | 0.000    | 1.000     | Helix-loop-helix DNA-binding domain                               | 4-helices; bundle, closed, left-handed twist; 2 crossover connections                                             |
| 46  | a.105      | 2     | 1.000    | 1.000     | FIS-like                                                          | multihelical; intertwined dimer of identical 4-helical subunits                                                   |
| 47  | a.112      | 5     | 0.050    | 0.450     | RNA polymerase sigma subunit                                      | multihelical; consists of several all-alpha subdomains                                                            |
| 48  | a.4        | 117   | 0.219    | 0.560     | DNA/RNA-binding 3-helical bundle                                  | core: 3-helices; bundle, closed or partly opened, right-handed twist; up-and down                                 |
| 49  | a.60       | 29    | 0.074    | 0.422     | SAM domain-like                                                   | 4-5 helices; bundle of two orthogonally packed alpha-hairpins; involved in the interactions with DNA and proteins |

Table 3. True Positive Rates at 1% False Positive Rate, for VAST and SHEBA, for 468 SCOP Folds in the order of the Heat Map.

| $i$ | Class Fold | $N_i$ | TPR VAST | TPR SHEBA | Fold Name                                                | Fold Description                                                                |
|-----|------------|-------|----------|-----------|----------------------------------------------------------|---------------------------------------------------------------------------------|
| 50  | a.61       | 6     | 0.200    | 0.600     | Retroviral matrix proteins                               | 4-5 helices; right-handed superhelix                                            |
| 51  | a.74       | 17    | 0.787    | 0.938     | Cyclin-like                                              | core: 5 helices; one helix is surrounded by the others                          |
| 52  | a.79       | 2     | 1.000    | 1.000     | Antitermination factor NusB                              | 6 helices: bundle; one central helix is surrounded by 5 others                  |
| 53  | a.11       | 5     | 0.900    | 1.000     | Acyl-CoA binding protein-like                            | core: 3 helices; bundle, closed, left-handed twist; up-and-down                 |
| 54  | a.83       | 2     | 1.000    | 1.000     | Guanido kinase N-terminal domain                         | irregular array of 6 short helices                                              |
| 55  | a.35       | 11    | 0.245    | 0.836     | lambda repressor-like DNA-binding domains                | core: 4 helices; folded leaf, closed                                            |
| 56  | a.77       | 12    | 0.962    | 0.992     | DEATH domain                                             | 6 helices: closed bundle; greek-key; internal pseudo twofold symmetry           |
| 57  | a.140      | 3     | 0.333    | 1.000     | LEM/SAP HeH motif                                        | helix-extended loop-helix; parallel helices                                     |
| 58  | a.156      | 5     | 0.500    | 1.000     | S13-like H2TH domain                                     | core: 3-4 helices                                                               |
| 59  | a.20       | 3     | 0.333    | 1.000     | PGBD-like                                                | core: 3 helices; bundle, closed, left-handed twist; parallel                    |
| 60  | a.40       | 6     | 0.667    | 0.967     | CH domain-like                                           | core: 4 helices: bundle                                                         |
| 61  | a.142      | 2     | 1.000    | 1.000     | PTS-regulatory domain, PRD                               | core: 4 helices; bundle, closed, right-handed twist; 1 crossover connection     |
| 62  | a.149      | 2     | 1.000    | 1.000     | RNase III endonuclease catalytic domain                  | core: 5 helices; one helix is surrounded by the others                          |
| 63  | a.75       | 2     | 1.000    | 1.000     | Ribosomal protein S7                                     | core: 5 helices; contains one more helix and a beta-hairpin outside the core    |
| 64  | a.144      | 4     | 0.167    | 0.750     | PABP domain-like                                         | 4 helices; an orthogonal array                                                  |
| 65  | a.5        | 10    | 0.167    | 0.756     | RuvA C-terminal domain-like                              | 3 helices; bundle, right-handed twist                                           |
| 66  | a.10       | 2     | 1.000    | 1.000     | Protozoan pheromone proteins                             | 3 helices; bundle, closed, left-handed twist, up-and-down                       |
| 67  | a.158      | 2     | 0.000    | 1.000     | F-box domain                                             | multihelical; interlocked heterodimer with the Skp1 dimerisation domain         |
| 68  | a.37       | 2     | 0.000    | 1.000     | A DNA-binding domain in eukaryotic transcription factors | 4 helices; the long C-terminal helix protrudes from the domain and binds to DNA |
| 69  | a.159      | 2     | 0.000    | 1.000     | Another 3-helical bundle                                 | topologically similar to the DNA/RNA-binding bundles; distinct packing          |
| 70  | a.36       | 2     | 1.000    | 1.000     | Signal peptide-binding domain                            | 4 helices; orthogonal array                                                     |
| 71  | a.56       | 3     | 1.000    | 1.000     | CO dehydrogenase ISP C-domain like                       | core: 4 helices, bundle                                                         |
| 72  | a.132      | 2     | 1.000    | 1.000     | Heme oxygenase                                           | multihelical; bundle                                                            |
| 73  | a.25       | 14    | 0.346    | 0.670     | Ferritin-like                                            | core: 4 helices; bundle, closed, left-handed twist; 1 crossover connection      |
| 74  | a.87       | 6     | 0.633    | 1.000     | DBL homology domain (DH-domain)                          | multihelical; core: 5-helical bundle                                            |
| 75  | a.29       | 12    | 0.197    | 0.576     | Bromodomain-like                                         | 4 helices; bundle; minor mirror variant of up-and-down topology                 |

Table 3. True Positive Rates at 1% False Positive Rate, for VAST and SHEBA, for 468 SCOP Folds in the order of the Heat Map.

| $i$ | Class Fold | $N_i$ | TPR VAST | TPR SHEBA | Fold Name                                                                    | Fold Description                                                                                     |
|-----|------------|-------|----------|-----------|------------------------------------------------------------------------------|------------------------------------------------------------------------------------------------------|
| 76  | a.26       | 26    | 0.385    | 0.878     | 4-helical cytokines                                                          | core: 4 helices; bundle, closed; left-handed twist; 2 crossover connections                          |
| 77  | a.66       | 2     | 1.000    | 1.000     | Transducin (alpha subunit), insertion domain                                 | 5 helices; folded leaf                                                                               |
| 78  | a.48       | 3     | 0.000    | 0.333     | N-cbl like                                                                   | 4 helices; bundle, left-handed twist; left-handed superhelix                                         |
| 79  | a.24       | 31    | 0.253    | 0.703     | Four-helical up-and-down bundle                                              | core: 4 helices; bundle, closed or partly opened, left-handed twist; up-and-down                     |
| 80  | a.73       | 3     | 1.000    | 1.000     | Retrovirus capsid protein, N-terminal core domain                            | core: 5 helices; bundle                                                                              |
| 81  | a.80       | 4     | 1.000    | 1.000     | DNA polymerase III clamp loader subunits, C-terminal domain                  | core: 5 helices: bundle                                                                              |
| 82  | a.63       | 2     | 1.000    | 1.000     | Apolipoprotein III                                                           | 5 helices; bundle, closed, left-handed twist                                                         |
| 83  | a.23       | 5     | 0.000    | 0.050     | Open three-helical up-and-down bundle                                        | core: 3 helices; bundle, open                                                                        |
| 84  | a.27       | 9     | 0.583    | 0.889     | Anticodon-binding domain of a subclass of class I aminoacyl-tRNA synthetases | core: 4 helices; bundle; one loop crosses over one side of the bundle                                |
| 85  | a.45       | 20    | 0.779    | 1.000     | Glutathione S-transferase (GST), C-terminal domain                           | core: 4 helices; bundle, closed, left-handed twist; right-handed superhelix                          |
| 86  | a.46       | 4     | 0.500    | 1.000     | Methionine synthase domain-like                                              | 4 helices; bundle, left-handed twist; right-handed superhelix                                        |
| 87  | a.52       | 5     | 0.250    | 0.950     | Bifunctional inhibitor/lipid-transfer protein/seed storage 2S albumin        | 4 helices; folded leaf; right-handed superhelix                                                      |
| 88  | a.65       | 3     | 1.000    | 0.667     | Annexin                                                                      | 5 helices; folded leaf, closed                                                                       |
| 89  | a.85       | 2     | 1.000    | 1.000     | Hemocyanin, N-terminal domain                                                | 6 helices; bundle; one central helix is surrounded by 5 others                                       |
| 90  | a.64       | 5     | 0.300    | 0.750     | Saposin-like                                                                 | 5 helices; folded leaf, closed                                                                       |
| 91  | a.71       | 3     | 1.000    | 1.000     | ERP29 C domain-like                                                          | 5 helices; bundle                                                                                    |
| 92  | a.16       | 2     | 0.000    | 1.000     | S15/NS1 RNA-binding domain                                                   | 3 helices; irregular array                                                                           |
| 93  | a.2        | 17    | 0.033    | 0.632     | Long alpha-hairpin                                                           | 2 helices; antiparallel hairpin, left-handed twist                                                   |
| 94  | a.47       | 5     | 0.200    | 1.000     | STAT-like                                                                    | 4 long helices; bundle, left-handed twist (coiled coil); right-handed superhelix                     |
| 95  | a.7        | 19    | 0.202    | 0.854     | Spectrin repeat-like                                                         | 3 helices; bundle, closed, left-handed twist; up-and-down                                            |
| 96  | a.44       | 2     | 1.000    | 1.000     | Disulphide-bond formation facilitator (DSBA), insertion domain               | 4 helices; bundle, partly opened, left-handed twist; up-and-down                                     |
| 97  | a.8        | 3     | 0.667    | 1.000     | immunoglobulin/albumin-binding domain-like                                   | 3 helices; bundle, closed, left-handed twist; up-and-down; mirror topology to the spectrin-like fold |

Table 3. True Positive Rates at 1% False Positive Rate, for VAST and SHEBA, for 468 SCOP Folds in the order of the Heat Map.

| $i$ | Class Fold | $N_i$ | TPR VAST | TPR SHEBA | Fold Name                                                          | Fold Description                                                                                      |
|-----|------------|-------|----------|-----------|--------------------------------------------------------------------|-------------------------------------------------------------------------------------------------------|
| 98  | b.68       | 14    | 0.912    | 0.978     | 6-bladed beta-propeller                                            | consists of six 4-stranded beta-sheet motifs; meander                                                 |
| 99  | b.69       | 19    | 0.772    | 0.988     | 7-bladed beta-propeller                                            | consists of seven 4-stranded beta-sheet motifs; meander                                               |
| 100 | b.66       | 5     | 1.000    | 1.000     | 4-bladed beta-propeller                                            | consists of four 4-stranded beta-sheet motifs; meander                                                |
| 101 | b.67       | 2     | 1.000    | 1.000     | 5-bladed beta-propeller                                            | consists of five 4-stranded beta-sheet motifs; meander                                                |
| 102 | b.70       | 5     | 0.600    | 0.900     | 8-bladed beta-propeller                                            | consists of eight 4-stranded beta-sheet motifs; meander                                               |
| 103 | b.1        | 241   | 0.701    | 0.680     | Immunoglobulin-like beta-sandwich                                  | sandwich; 7 strands in 2 sheets; greek-key                                                            |
| 104 | b.2        | 27    | 0.368    | 0.425     | Common fold of diphtheria toxin/transcription factors/cytochrome f | sandwich; 9 strands in 2 sheet; greek-key; subclass of immunoglobulin-like fold                       |
| 105 | b.3        | 11    | 0.673    | 0.582     | Prealbumin-like                                                    | sandwich; 7 strands in 2 sheets, greek-key                                                            |
| 106 | b.7        | 14    | 0.725    | 0.758     | C2 domain-like                                                     | sandwich; 8 strands in 2 sheets; greek-key                                                            |
| 107 | b.12       | 4     | 1.000    | 1.000     | Lipase/lipoxygenase domain (PLAT/LH2 domain)                       | sandwich; 8 strands in 2 sheets; complex topology                                                     |
| 108 | b.24       | 3     | 1.000    | 1.000     | Hyaluronate lyase-like, C-terminal domain                          | sandwich, 10 strands in 2 sheets; "folded meander"                                                    |
| 109 | b.71       | 21    | 0.924    | 0.964     | alpha-Amylases, C-terminal beta-sheet domain                       | folded sheet; greek-key                                                                               |
| 110 | b.106      | 3     | 0.000    | 0.000     | Phage tail proteins                                                | core: barrel; n=6, S=10; greek-key; topologically similar to the FMN-binding split barrel             |
| 111 | b.85       | 13    | 0.192    | 0.250     | beta-clip                                                          | double-stranded ribbon sharply bent in two places; the ribbon ends form incomplete barrel; jelly-roll |
| 112 | b.82       | 31    | 0.277    | 0.359     | Double-stranded beta-helix                                         | one turn of helix is made by two pairs of antiparallel strands linked with short turns                |
| 113 | b.30       | 11    | 0.400    | 0.555     | Supersandwich                                                      | sandwich; 18 strands in 2 sheets                                                                      |
| 114 | b.21       | 3     | 0.333    | 0.333     | Virus attachment protein                                           | sandwich, 10 strands in 2 sheets; greek-key                                                           |
| 115 | b.83       | 2     | 0.000    | 0.000     | Triple beta-spiral                                                 | trimer formed by the interlocking beta-hairpin repeat units                                           |
| 116 | b.37       | 2     | 0.000    | 0.500     | N-terminal domains of the minor coat protein g3p                   | core: barrel, in some members open; n*=4, S*=8; meander                                               |
| 117 | b.53       | 3     | 0.333    | 0.500     | Ribosomal protein L25-like                                         | barrel, closed; n=6, S=10; complex topology                                                           |
| 118 | b.29       | 33    | 0.455    | 0.729     | Concanavalin A-like lectins/glucanases                             | sandwich; 12-14 strands in 2 sheets; complex topology                                                 |
| 119 | b.92       | 8     | 0.411    | 0.786     | Composite domain of metallo-dependent hydrolases                   | pseudobarrel; mixed sheet of 7 strand folded upon itself and "buckled" by two beta-turns              |
| 120 | b.45       | 4     | 0.833    | 0.750     | FMN-binding split barrel                                           | barrel; n=6, S=10; greek-key                                                                          |
| 121 | b.35       | 9     | 0.514    | 0.708     | GroES-like                                                         | contains barrel, partly opened; n*=4, S*=8; meander                                                   |
| 122 | b.40       | 87    | 0.414    | 0.571     | OB-fold                                                            | barrel, closed or partly opened n=5, S=10 or S=8; greek-key                                           |
| 123 | b.84       | 14    | 0.275    | 0.522     | Barrel-sandwich hybrid                                             | sandwich of half-barrel shaped beta-sheets                                                            |
| 124 | b.42       | 24    | 0.998    | 0.835     | beta-Trefoil                                                       | barrel, closed; n=6, S=12; and a hairpin triplet; meander                                             |

Table 3. True Positive Rates at 1% False Positive Rate, for VAST and SHEBA, for 468 SCOP Folds in the order of the Heat Map.

| $i$ | Class Fold | $N_i$ | TPR VAST | TPR SHEBA | Fold Name                                                   | Fold Description                                                                                                                                     |
|-----|------------|-------|----------|-----------|-------------------------------------------------------------|------------------------------------------------------------------------------------------------------------------------------------------------------|
| 125 | b.88       | 3     | 0.333    | 0.833     | Mss4-like                                                   | complex fold made of several coiled beta-sheets                                                                                                      |
| 126 | b.80       | 11    | 0.455    | 0.827     | Single-stranded right-handed beta-helix                     | superhelix with each turn made by 3 strands with short links                                                                                         |
| 127 | b.81       | 9     | 1.000    | 0.972     | Single-stranded left-handed beta-helix                      | superhelix with each turn made by 3 strands with short links                                                                                         |
| 128 | b.57       | 3     | 1.000    | 1.000     | Herpes virus serine proteinase, assemblin                   | core: barrel, closed; n=7, S=8; complex topology                                                                                                     |
| 129 | b.47       | 31    | 0.920    | 0.994     | Trypsin-like serine proteases                               | barrel, closed; n=6, S=8; greek-key                                                                                                                  |
| 130 | b.77       | 5     | 0.900    | 1.000     | beta-Prism I                                                | consists of 3 4-stranded sheets; strands are parallel to the 3-fold axis                                                                             |
| 131 | b.26       | 5     | 0.750    | 0.950     | SMAD/FHA domain                                             | sandwich; 11 strands in 2 sheets; greek-key                                                                                                          |
| 132 | b.41       | 2     | 1.000    | 1.000     | Photosynthetic reaction centre, H-chain, cytoplasmic domain | core: barrel, partly opened; n*=5, S*=8; meander                                                                                                     |
| 133 | b.87       | 4     | 0.667    | 1.000     | LexA/Signal peptidase                                       | complex fold made of several coiled beta-sheets; contains an SH3-like barrel                                                                         |
| 134 | b.62       | 2     | 1.000    | 1.000     | Cyclophilin (peptidylprolyl isomerase)                      | barrel, closed; n=8, S=10; complex topology                                                                                                          |
| 135 | b.36       | 15    | 0.790    | 1.000     | PDZ domain-like                                             | contains barrel, partly opened; n*=4, S*=8; meander; capped by alpha-helix                                                                           |
| 136 | b.118      | 2     | 1.000    | 1.000     | FAS1 domain                                                 | core: barrel, closed; n=7, S=12; meander                                                                                                             |
| 137 | b.113      | 4     | 1.000    | 1.000     | N-terminal domain of MutM-like DNA repair proteins          | pseudobarrel; capped on both ends by alpha-helices                                                                                                   |
| 138 | b.39       | 2     | 1.000    | 1.000     | Ribosomal protein L14                                       | barrel, closed; n=5, S=8, meander                                                                                                                    |
| 139 | b.17       | 3     | 1.000    | 1.000     | PEBP-like                                                   | sandwich; 8 strands in 2 sheets; greek-key; partial topological similarity to immunoglobulin-like folds                                              |
| 140 | b.6        | 38    | 0.908    | 0.922     | Cupredoxin-like                                             | sandwich; 7 strands in 2 sheets, greek-key                                                                                                           |
| 141 | b.55       | 28    | 0.927    | 0.975     | PH domain-like                                              | barrel, partly opened; n*=6, S*=12; meander; capped by an alpha-helix                                                                                |
| 142 | b.64       | 2     | 1.000    | 1.000     | Mannose 6-phosphate receptor domain                         | barrel, partly open; n*=8, S*=10; one psi loop                                                                                                       |
| 143 | b.74       | 4     | 1.000    | 1.000     | Carbonic anhydrase                                          | single sheet; 10 strands                                                                                                                             |
| 144 | b.65       | 2     | 1.000    | 1.000     | triple barrel                                               | dimer of two non-identical subunits; forms two similar barrels, n=8, S=10 each, that are fused together with the formation of third barrel, n=6, S=8 |
| 145 | b.46       | 2     | 1.000    | 1.000     | FMT C-terminal domain-like                                  | barrel, open; n*=6, S*=10; greek-key                                                                                                                 |
| 146 | b.86       | 4     | 1.000    | 1.000     | Hedgehog/intein (Hint) domain                               | complex fold made of five beta-hairpin units and a b-ribbon arc                                                                                      |
| 147 | b.50       | 12    | 0.697    | 0.682     | Acid proteases                                              | barrel, closed; n=6, S=10, complex topology                                                                                                          |
| 148 | b.52       | 12    | 0.712    | 0.886     | Double psi beta-barrel                                      | barrel, closed; n=6, S=10; complex topology with crossover (psi) loops                                                                               |
| 149 | b.51       | 4     | 0.667    | 1.000     | ValRS/IleRS/LeuRS editing domain                            | core: barrel, closed; n=6, S=8; topology is similar to that of the acid proteases barrel                                                             |

Table 3. True Positive Rates at 1% False Positive Rate, for VAST and SHEBA, for 468 SCOP Folds in the order of the Heat Map.

| $i$ | Class Fold | $N_i$ | TPR VAST | TPR SHEBA | Fold Name                                                 | Fold Description                                                                                                                                                                                               |
|-----|------------|-------|----------|-----------|-----------------------------------------------------------|----------------------------------------------------------------------------------------------------------------------------------------------------------------------------------------------------------------|
| 150 | b.76       | 2     | 0.000    | 1.000     | open-sided beta-meander                                   | single sheet formed by beta-hairpin repeats; exposed on both sides in the middle                                                                                                                               |
| 151 | b.91       | 2     | 1.000    | 1.000     | E2 regulatory, transactivation domain                     | complex fold made of bifurcated and coiled beta-sheets                                                                                                                                                         |
| 152 | b.11       | 11    | 0.909    | 0.955     | gamma-Crystallin-like                                     | sandwich; 8 strands in 2 sheets; greek-key                                                                                                                                                                     |
| 153 | b.93       | 2     | 1.000    | 1.000     | Epsilon subunit of F1F0-ATP synthase N-terminal domain    | pseudobarrel: sandwich of two sheets packed at a positive interstrand angle and interconnected with many short turns                                                                                           |
| 154 | b.15       | 3     | 1.000    | 1.000     | HSP20-like chaperones                                     | sandwich; 8 strands in 2 sheets; greek-key                                                                                                                                                                     |
| 155 | b.63       | 2     | 1.000    | 1.000     | Oncogene products                                         | barrel, closed; n=8, S=10; one overside connection                                                                                                                                                             |
| 156 | b.33       | 6     | 1.000    | 1.000     | ISP domain                                                | consists of two all-beta subdomains: conserved small domain has a rubredoxin-like fold; larger domain consists of 6 beta-stands packed in either sandwich of two 3-stranded sheets or closed barrel (n=6; S=8) |
| 157 | b.8        | 3     | 1.000    | 1.000     | TRAF domain-like                                          | sandwich; 8 strands in 2 sheets; greek-key                                                                                                                                                                     |
| 158 | b.60       | 21    | 0.717    | 0.895     | Lipocalins                                                | barrel, closed or opened; n=8, S=12; meander                                                                                                                                                                   |
| 159 | b.61       | 9     | 0.917    | 0.903     | Streptavidin-like                                         | barrel, closed; n=8, S=10; meander                                                                                                                                                                             |
| 160 | b.43       | 27    | 0.769    | 0.724     | Reductase/isomerase/elongation factor common domain       | barrel, closed; n=6, S=10; greek-key                                                                                                                                                                           |
| 161 | b.49       | 4     | 0.500    | 0.500     | Domain of alpha and beta subunits of F1 ATP synthase-like | barrel, closed; n=6, S=8; greek-key                                                                                                                                                                            |
| 162 | b.58       | 5     | 0.700    | 0.600     | PK beta-barrel domain-like                                | barrel, closed; n=7, S=10; complex topology                                                                                                                                                                    |
| 163 | b.44       | 3     | 0.667    | 1.000     | EF-Tu/eEF-1alpha/eIF2-gamma C-terminal domain             | barrel, closed; n=6, S=10; greek-key                                                                                                                                                                           |
| 164 | b.107      | 2     | 1.000    | 1.000     | Urease metallochaperone UreE, N-terminal domain           | barrel, closed; n=6, S=8; a crossover loop topology                                                                                                                                                            |
| 165 | b.4        | 2     | 1.000    | 1.000     | HSP40/DnaJ peptide-binding domain                         | sandwich; 6 strands in 2 sheets                                                                                                                                                                                |
| 166 | b.34       | 52    | 0.407    | 0.604     | SH3-like barrel                                           | barrel, partly opened; n*=4, S*=8; meander                                                                                                                                                                     |
| 167 | b.38       | 10    | 0.911    | 1.000     | Sm-like fold                                              | core: barrel, open; n*=4, S*=8; meander; SH3-like topology                                                                                                                                                     |
| 168 | b.56       | 2     | 1.000    | 1.000     | Transcription factor IIA (TFIIA), N-terminal domain       | barrel, closed; n=6, S=12; mixed beta-sheet                                                                                                                                                                    |
| 169 | b.72       | 10    | 0.322    | 0.600     | WW domain-like                                            | core: 3-stranded meander beta-sheet                                                                                                                                                                            |
| 170 | b.10       | 41    | 0.463    | 0.712     | Viral coat and capsid proteins                            | sandwich; 8 strands in 2 sheets; jelly-roll                                                                                                                                                                    |
| 171 | b.19       | 6     | 0.367    | 0.500     | Viral protein domain                                      | sandwich; 9 strands in 2 sheets; jelly-roll; form trimers                                                                                                                                                      |
| 172 | b.13       | 11    | 0.436    | 0.691     | Nucleoplasmin/PNGase F-like                               | sandwich; 8 strands in 2 sheets; jelly-roll                                                                                                                                                                    |
| 173 | b.18       | 24    | 0.601    | 0.832     | Galactose-binding domain-like                             | sandwich; 9 strands in 2 sheets; jelly-roll                                                                                                                                                                    |
| 174 | b.22       | 7     | 1.000    | 1.000     | TNF-like                                                  | sandwich, 10 strands in 2 sheets; jelly-roll                                                                                                                                                                   |
| 175 | b.23       | 2     | 1.000    | 1.000     | Spermadhesin, CUB domain                                  | sandwich, 10 strands in 2 sheets; jelly-roll                                                                                                                                                                   |

Table 3. True Positive Rates at 1% False Positive Rate, for VAST and SHEBA, for 468 SCOP Folds in the order of the Heat Map.

| <i>i</i> | Class Fold | $N_i$ | TPR VAST | TPR SHEBA | Fold Name                                                     | Fold Description                                                                                                                                                                                                |
|----------|------------|-------|----------|-----------|---------------------------------------------------------------|-----------------------------------------------------------------------------------------------------------------------------------------------------------------------------------------------------------------|
| 176      | c.1        | 182   | 0.863    | 0.746     | TIM beta/alpha-barrel                                         | contains parallel beta-sheet barrel, closed; n=8, S=8; strand order 12345678                                                                                                                                    |
| 177      | c.6        | 3     | 1.000    | 1.000     | Cellulases                                                    | variant of beta/alpha barrel; parallel beta-sheet barrel, closed, n=7, S=8; strand order 1234567                                                                                                                |
| 178      | c.10       | 18    | 0.546    | 0.892     | Leucine-rich repeat, LRR (right-handed beta-alpha superhelix) | 2 curved layers, a/b; parallel beta-sheet; order 1234...N                                                                                                                                                       |
| 179      | c.14       | 11    | 0.827    | 0.682     | ClpP/crotonase                                                | core: 4 turns of (beta-beta-alpha) <sub>n</sub> superhelix                                                                                                                                                      |
| 180      | c.12       | 2     | 1.000    | 0.500     | Ribosomal proteins L15p and L18e                              | core: three turns of irregular (beta-beta-alpha) <sub>n</sub> superhelix                                                                                                                                        |
| 181      | c.7        | 4     | 0.833    | 1.000     | PFL-like glycyl radical enzymes                               | contains: barrel, closed; n=10, S=10; accommodates a hairpin loop inside the barrel                                                                                                                             |
| 182      | c.117      | 3     | 1.000    | 1.000     | Amidase signature (AS) enzymes                                | possible duplication: the topologies of N- and C-terminal halves are similar; 3 layers: a/b/a; single mixed beta-sheet of 10 strands, order 213549A867 (A=10); strands from 5 to 9 are antiparallel to the rest |
| 183      | c.83       | 2     | 1.000    | 1.000     | Aconitase iron-sulfur domain                                  | consists of three similar domains with 3 layers (a/b/a) each; duplication                                                                                                                                       |
| 184      | c.43       | 7     | 0.714    | 0.833     | CoA-dependent acyltransferases                                | core: 2 layers, a/b; mixed beta-sheet of 6 strands, order 324561; strands 3 & 6 are antiparallel to the rest                                                                                                    |
| 185      | c.74       | 3     | 1.000    | 1.000     | AraD-like aldolase/epimerase                                  | 3 layers: a/b/a; mixed (mostly antiparallel) beta-sheet of 9 strands, order 432159876; left-handed crossover between strands 4 and 5                                                                            |
| 186      | c.107      | 2     | 0.000    | 1.000     | DHH phosphoesterases                                          | consists of two non-similar domains                                                                                                                                                                             |
| 187      | c.37       | 122   | 0.281    | 0.283     | P-loop containing nucleotide triphosphate hydrolases          | 3 layers: a/b/a, parallel or mixed beta-sheets of variable sizes                                                                                                                                                |
| 188      | c.92       | 11    | 0.455    | 0.664     | Chelatase-like                                                | duplication: tandem repeat of two domains; 3 layers (a/b/a); parallel beta-sheet of 4 strands, order 2134                                                                                                       |
| 189      | c.52       | 23    | 0.202    | 0.294     | Restriction endonuclease-like                                 | core: 3 layers, a/b/a; mixed beta-sheet of 5 strands, order 12345; strands 2 & 5 are antiparallel to the rest                                                                                                   |
| 190      | c.55       | 53    | 0.279    | 0.379     | Ribonuclease H-like motif                                     | 3 layers: a/b/a; mixed beta-sheet of 5 strands, order 32145; strand 2 is antiparallel to the rest                                                                                                               |
| 191      | c.9        | 2     | 0.000    | 0.000     | Barstar-like                                                  | 2 layers, a/b; parallel beta-sheet of 3 strands, order 123                                                                                                                                                      |
| 192      | c.94       | 25    | 0.443    | 0.790     | Periplasmic binding protein-like II                           | consists of two similar intertwined domain with 3 layers (a/b/a) each: duplication                                                                                                                              |
| 193      | c.76       | 6     | 0.600    | 1.000     | Alkaline phosphatase-like                                     | core:3 layers: a/b/a; mixed beta-sheet of 8 strands, order 43516728, strand 7 is antiparallel to the rest                                                                                                       |
| 194      | c.97       | 4     | 0.833    | 0.750     | Cytidine deaminase-like                                       | core: alpha-beta(2)-(alpha-beta) <sub>2</sub> ; 3 layers (a/b/a); mixed beta-sheet of 4 strands, order 2134; strand 2 is antiparallel to the rest                                                               |
| 195      | c.47       | 51    | 0.908    | 0.864     | Thioredoxin fold                                              | core: 3 layers, a/b/a; mixed beta-sheet of 4 strands, order 4312; strand 3 is antiparallel to the rest                                                                                                          |



Table 3. True Positive Rates at 1% False Positive Rate, for VAST and SHEBA, for 468 SCOP Folds in the order of the Heat Map.

| $i$ | Class Fold | $N_i$ | TPR VAST | TPR SHEBA | Fold Name                                                           | Fold Description                                                                                                                         |
|-----|------------|-------|----------|-----------|---------------------------------------------------------------------|------------------------------------------------------------------------------------------------------------------------------------------|
| 196 | c.67       | 35    | 0.966    | 1.000     | PLP-dependent transferases                                          | main domain: 3 layers: a/b/a, mixed beta-sheet of 7 strands, order 3245671; strand 7 is antiparallel to the rest                         |
| 197 | c.81       | 5     | 1.000    | 1.000     | Formate dehydrogenase/DMSO reductase, domains 1-3                   | contains of two similar intertwined domains related by pseudodyad; duplication                                                           |
| 198 | c.22       | 2     | 1.000    | 1.000     | Ribosomal protein L4                                                | 3 layers, a/b/a; core: parallel beta-sheet of 4 strands, order 1423                                                                      |
| 199 | c.82       | 7     | 1.000    | 1.000     | ALDH-like                                                           | consists of two similar domains with 3 layers (a/b/a) each; duplication                                                                  |
| 200 | c.77       | 4     | 1.000    | 1.000     | Isocitrate/Isopropylmalate dehydrogenases                           | consists of two intertwined (sub)domains related by pseudodyad; duplication                                                              |
| 201 | c.109      | 4     | 1.000    | 1.000     | PEP carboxykinase N-terminal domain                                 | contains mixed beta-sheets; topology is partly similar to that of the catalytic C-terminal domain                                        |
| 202 | c.91       | 4     | 0.917    | 1.000     | PEP carboxykinase-like                                              | contains a P-loop NTP-binding motif; mixed beta-sheet folds into a barrel-like structure with helices packed on one side                 |
| 203 | c.68       | 15    | 0.948    | 0.981     | Nucleotide-diphospho-sugar transferases                             | 3 layers: a/b/a; mixed beta-sheet of 7 strands, order 3214657; strand 6 is antiparallel to the rest                                      |
| 204 | c.79       | 6     | 1.000    | 1.000     | Tryptophan synthase beta subunit-like PLP-dependent enzymes         | consists of two similar domains related by pseudodyad; duplication                                                                       |
| 205 | c.8        | 10    | 0.422    | 0.644     | The "swivelling" beta/beta/alpha domain                             | 3 layers: b/b/a; the central sheet is parallel, and the other one is antiparallel; there are some variations in topology                 |
| 206 | c.98       | 4     | 0.833    | 1.000     | MurF and HprK N-domain-like                                         | core: 3 layers, a/b/a; parallel beta-sheet of 4 strands, order 1234; structural similarity of the MurF and HprK extends beyond the core. |
| 207 | c.86       | 2     | 1.000    | 1.000     | Phosphoglycerate kinase                                             | consists of two non-similar domains, 3 layers (a/b/a) each                                                                               |
| 208 | c.45       | 12    | 1.000    | 1.000     | (Phosphotyrosine protein) phosphatases II                           | core: 3 layers, a/b/a; parallel beta-sheet of 4 strands, order 1432                                                                      |
| 209 | c.60       | 7     | 0.762    | 0.976     | Phosphoglycerate mutase-like                                        | core: 3 layers, a/b/a; mixed beta-sheet of 6 strands, order 324156; strand 5 is antiparallel to the rest                                 |
| 210 | c.71       | 8     | 1.000    | 1.000     | Dihydrofolate reductases                                            | 3 layers: a/b/a; mixed beta-sheet of 8 strands, order 34251687; strand 8 is antiparallel to the rest                                     |
| 211 | c.84       | 6     | 1.000    | 0.767     | Phosphoglucomutase, first 3 domains                                 | consists of three similar domains with 3 layers (a/b/a) each; duplication                                                                |
| 212 | c.95       | 13    | 0.885    | 0.981     | Thiolase-like                                                       | consists of two similar domains related by pseudodyad; duplication                                                                       |
| 213 | c.101      | 2     | 1.000    | 1.000     | Undecaprenyl diphosphate synthase                                   | 3 layers: a/b/a; parallel beta-sheet of 6 strands, order 342156                                                                          |
| 214 | c.73       | 2     | 1.000    | 1.000     | Carbamate kinase-like                                               | 3 layers: a/b/a; mixed (mainly parallel) beta-sheet of 8 strands, order 34215786; strand 8 is antiparallel to the rest                   |
| 215 | c.27       | 3     | 1.000    | 1.000     | Nucleoside phosphorylase/phosphoribosyltransferase catalytic domain | 3 layers: a/b/a; parallel beta-sheet of 5 strands, order 32145; Rossmann-like                                                            |

Table 3. True Positive Rates at 1% False Positive Rate, for VAST and SHEBA, for 468 SCOP Folds in the order of the Heat Map.

| $i$ | Class Fold | $N_i$ | TPR VAST | TPR SHEBA | Fold Name                                                                            | Fold Description                                                                                                                                                           |
|-----|------------|-------|----------|-----------|--------------------------------------------------------------------------------------|----------------------------------------------------------------------------------------------------------------------------------------------------------------------------|
| 216 | c.66       | 35    | 0.707    | 0.731     | S-adenosyl-L-methionine-dependent methyltransferases                                 | core: 3 layers, a/b/a; mixed beta-sheet of 7 strands, order 3214576; strand 7 is antiparallel to the rest                                                                  |
| 217 | c.72       | 15    | 0.771    | 0.714     | Ribokinase-like                                                                      | core: 3 layers: a/b/a; mixed beta-sheet of 8 strands, order 21345678, strand 7 is antiparallel to the rest                                                                 |
| 218 | c.87       | 6     | 0.533    | 0.933     | UDP-Glycosyltransferase/glycogen phosphorylase                                       | consists of two non-similar domains with 3 layers (a/b/a) each                                                                                                             |
| 219 | c.70       | 2     | 1.000    | 1.000     | Nucleoside hydrolase                                                                 | core: 3 layers, a/b/a ; mixed beta-sheet of 8 strands, order 32145687; strand 7 is antiparallel to the rest                                                                |
| 220 | c.35       | 3     | 1.000    | 0.667     | Phosphosugar isomerase                                                               | core: 3 layers: a/b/a; parallel beta-sheet of 6 strands, order 321456                                                                                                      |
| 221 | c.63       | 5     | 0.600    | 0.950     | CoA transferase                                                                      | core: 3 layers: a/b/a; beta-sheet of 7 strands, order 4321567; part of sheet is folded upon itself and forms a barrel-like structure                                       |
| 222 | c.106      | 2     | 1.000    | 1.000     | SurE-like                                                                            | 3 layers: a/b/a; mixed beta-sheet of 9 strands, order 342156798; strands 3, 8 and 9 are antiparallel to the rest; left-handed crossover connection between strands 6 and 7 |
| 223 | c.18       | 2     | 1.000    | 1.000     | DNA glycosylase                                                                      | 3 layers, a/b/a; core: parallel beta-sheet of 4 strands, order 2134                                                                                                        |
| 224 | c.51       | 13    | 0.718    | 0.718     | Anticodon-binding domain-like                                                        | 3 layers: a/b/a; mixed beta-sheet of five strands, order 21345; strand 4 is antiparallel to the rest                                                                       |
| 225 | c.39       | 2     | 1.000    | 1.000     | Nicotinate mononucleotide:5,6-dimethylbenzimidazole phosphoribosyltransferase (CobT) | 3 layers: a/b/a, parallel beta-sheet of 7 strands, order 3214567                                                                                                           |
| 226 | c.13       | 3     | 1.000    | 0.667     | SpoIIaa-like                                                                         | core: 4 turns of a (beta-alpha) <sub>n</sub> superhelix                                                                                                                    |
| 227 | c.36       | 19    | 0.982    | 0.933     | Thiamin diphosphate-binding fold (THDP-binding)                                      | 3 layers: a/b/a; parallel beta-sheet of 6 strands, order 213465                                                                                                            |
| 228 | c.41       | 4     | 1.000    | 1.000     | Subtilisin-like                                                                      | 3 layers: a/b/a, parallel beta-sheet of 7 strands, order 2314567; left-handed crossover connection between strands 2 & 3                                                   |
| 229 | c.17       | 3     | 0.667    | 0.833     | Caspase-like                                                                         | 3 layers, a/b/a; core: parallel beta-sheet of 4 strands, order 2134                                                                                                        |
| 230 | c.93       | 13    | 0.718    | 1.000     | Periplasmic binding protein-like I                                                   | consists of two similar intertwined domain with 3 layers (a/b/a) each: duplication                                                                                         |
| 231 | c.89       | 2     | 1.000    | 1.000     | Phosphofructokinase                                                                  | consists of two non-similar domains, 3 layers (a/b/a) each                                                                                                                 |
| 232 | c.42       | 3     | 1.000    | 1.000     | Arginase/deacetylase                                                                 | 3 layers: a/b/a, parallel beta-sheet of 8 strands, order 21387456                                                                                                          |
| 233 | c.50       | 2     | 1.000    | 1.000     | Leucine aminopeptidase (Aminopeptidase A), N-terminal domain                         | 3 layers: a/b/a; mixed beta-sheet of 5 strands, order 23145; strand 2 is antiparallel to the rest                                                                          |
| 234 | c.56       | 24    | 0.757    | 0.761     | Phosphorylase/hydrolase-like                                                         | core: 3 layers, a/b/a ; mixed beta-sheet of 5 strands: order 21354; strand 4 is antiparallel to the rest; contains crossover loops                                         |
| 235 | c.69       | 51    | 0.847    | 0.892     | alpha/beta-Hydrolases                                                                | core: 3 layers, a/b/a; mixed beta-sheet of 8 strands, order 12435678, strand 2 is antiparallel to the rest                                                                 |
| 236 | c.15       | 7     | 0.571    | 0.810     | BRCT domain                                                                          | 3 layers, a/b/a; core: parallel beta-sheet of 4 strands, order 2134                                                                                                        |

Table 3. True Positive Rates at 1% False Positive Rate, for VAST and SHEBA, for 468 SCOP Folds in the order of the Heat Map.

| $i$ | Class Fold | $N_i$ | TPR VAST | TPR SHEBA | Fold Name                                                | Fold Description                                                                                                                                        |
|-----|------------|-------|----------|-----------|----------------------------------------------------------|---------------------------------------------------------------------------------------------------------------------------------------------------------|
| 237 | c.80       | 6     | 0.867    | 0.833     | SIS domain                                               | 3 layers: a/b/a; parallel beta-sheet of 5 strands, order 21345                                                                                          |
| 238 | c.61       | 17    | 0.790    | 0.960     | PRTase-like                                              | core: 3 layers, a/b/a; mixed beta-sheet of 6 strands, order 321456; strand 3 is antiparallel to the rest                                                |
| 239 | c.19       | 3     | 0.667    | 0.500     | FabD/lysophospholipase-like                              | core: 3 layers, a/b/a; mixed beta-sheet of 6 strands, order 432156; strand 4 is antiparallel to the rest                                                |
| 240 | c.46       | 7     | 0.738    | 0.976     | Rhodanese/Cell cycle control phosphatase                 | 3 layers: a/b/a; parallel beta-sheet of 5 strands, order 32451                                                                                          |
| 241 | c.26       | 42    | 0.563    | 0.595     | Adenine nucleotide alpha hydrolase-like                  | core: 3 layers, a/b/a ; parallel beta-sheet of 5 strands, order 32145                                                                                   |
| 242 | c.53       | 9     | 0.750    | 0.444     | Resolvase-like                                           | Core: 3 layers: a/b/a; mixed beta-sheet of 5 strands, order 21345; strand 5 is antiparallel to the rest                                                 |
| 243 | c.58       | 11    | 0.491    | 0.555     | Aminoacid dehydrogenase-like, N-terminal domain          | core: 3 layers: a/b/a; parallel beta-sheet of 4 strands; 2134                                                                                           |
| 244 | c.100      | 2     | 1.000    | 1.000     | Thiamin pyrophosphokinase, catalytic domain              | 3 layers: a/b/a; parallel beta-sheet of 6 strands, order 432156                                                                                         |
| 245 | c.28       | 4     | 1.000    | 1.000     | Cryptochrome/photolyase, N-terminal domain               | 3 layers: a/b/a; parallel beta-sheet of 5 strands, order 32145; Rossmann-like                                                                           |
| 246 | c.25       | 12    | 1.000    | 1.000     | Ferredoxin reductase-like, C-terminal NADP-linked domain | 3 layers, a/b/a; parallel beta-sheet of 5 strands, order 32145                                                                                          |
| 247 | c.24       | 3     | 1.000    | 1.000     | Methylglyoxal synthase-like                              | 3 layers, a/b/a; parallel beta-sheet of 5 strands, order 32145                                                                                          |
| 248 | c.30       | 11    | 0.873    | 0.991     | PreATP-grasp domain                                      | 3 layers: a/b/a; parallel or mixed beta-sheet of 4 to 6 strands                                                                                         |
| 249 | c.78       | 12    | 0.871    | 0.515     | ATC-like                                                 | consists of two similar domains related by pseudodyad; duplication                                                                                      |
| 250 | c.108      | 11    | 0.982    | 0.836     | HAD-like                                                 | 3 layers: a/b/a; parallel beta-sheet of 6 strands, order 321456                                                                                         |
| 251 | c.116      | 5     | 1.000    | 1.000     | alpha/beta knot                                          | core: 3 layers: a/b/a, parallel beta-sheet of 5 strands, order 21435; contains a deep trefoil knot                                                      |
| 252 | c.31       | 10    | 0.978    | 0.822     | DHS-like NAD/FAD-binding domain                          | 3 layers: a/b/a; parallel beta-sheet of 6 strands, order 321456; Rossmann-like                                                                          |
| 253 | c.114      | 2     | 1.000    | 1.000     | YchN-like                                                | 3 layers: a/b/a, core: parallel beta-sheet of 5 strands, order 43215                                                                                    |
| 254 | c.3        | 46    | 0.969    | 0.801     | FAD/NAD(P)-binding domain                                | core: 3 layers, b/b/a; central parallel beta-sheet of 5 strands, order 32145; top antiparallel beta-sheet of 3 strands, meander                         |
| 255 | c.4        | 7     | 1.000    | 0.952     | Nucleotide-binding domain                                | 3 layers: a/b/a; parallel beta-sheet of 5 strands, order 32145; Rossmann-like                                                                           |
| 256 | c.49       | 6     | 0.867    | 0.633     | Pyruvate kinase C-terminal domain-like                   | 3 layers: a/b/a; mixed beta-sheet of 5 strands, order 32145, strand 5 is antiparallel to the rest                                                       |
| 257 | c.59       | 5     | 1.000    | 1.000     | MurD-like peptide ligases, peptide-binding domain        | 3 layers: a/b/a; mixed beta-sheet of 6 strands, order 126345; strand 1 is antiparallel to the rest                                                      |
| 258 | c.16       | 3     | 1.000    | 1.000     | Lumazine synthase                                        | 3 layers, a/b/a; core: parallel beta-sheet of 4 strands, order 2134                                                                                     |
| 259 | c.57       | 3     | 1.000    | 1.000     | Molybdenum cofactor biosynthesis proteins                | 3 layers: a/b/a; mixed beta-sheet of 5 strands; order 21354, strand 5 is antiparallel to the rest; permutation of the Phosphorylase/hydrolase-like fold |

Table 3. True Positive Rates at 1% False Positive Rate, for VAST and SHEBA, for 468 SCOP Folds in the order of the Heat Map.

| $i$ | Class Fold | $N_i$ | TPR VAST | TPR SHEBA | Fold Name                                                              | Fold Description                                                                                                  |
|-----|------------|-------|----------|-----------|------------------------------------------------------------------------|-------------------------------------------------------------------------------------------------------------------|
| 260 | c.44       | 3     | 1.000    | 1.000     | Phosphotyrosine protein phosphatases I-like                            | 3 layers: a/b/a; parallel beta-sheet of 4 strands, order 2134                                                     |
| 261 | c.48       | 5     | 1.000    | 1.000     | TK C-terminal domain-like                                              | 3 layers: a/b/a; mixed beta-sheet of 5 strands, order 13245, strand 1 is antiparallel to the rest                 |
| 262 | c.2        | 99    | 0.885    | 0.741     | NAD(P)-binding Rossmann-fold domains                                   | core: 3 layers, a/b/a; parallel beta-sheet of 6 strands, order 321456                                             |
| 263 | c.33       | 3     | 1.000    | 1.000     | Cysteine hydrolase                                                     | 3 layers: a/b/a; parallel beta-sheet of 6 strands, order 321456                                                   |
| 264 | c.32       | 2     | 1.000    | 1.000     | Tubulin, GTPase domain                                                 | 3 layers: a/b/a; parallel beta-sheet of 6 strands, order 321456                                                   |
| 265 | c.34       | 2     | 1.000    | 1.000     | DFP DNA/pantothenate metabolism flavoprotein                           | 3 layers: a/b/a; parallel beta-sheet of 6 strands, order 321456                                                   |
| 266 | c.23       | 65    | 0.830    | 0.677     | Flavodoxin-like                                                        | 3 layers, a/b/a; parallel beta-sheet of 5 strand, order 21345                                                     |
| 267 | c.62       | 8     | 1.000    | 0.982     | vWA-like                                                               | core: 3 layers, a/b/a; mixed beta-sheet of 6 strands, order 321456; strand 3 is antiparallel to the rest          |
| 268 | c.65       | 3     | 1.000    | 1.000     | Formyltransferase                                                      | 3 layers: a/b/a; mixed beta-sheet of 7 strands, order 3214567; strand 6 is antiparallel to the rest               |
| 269 | c.5        | 2     | 1.000    | 1.000     | MurCD N-terminal domain                                                | 3 layers: a/b/a; parallel beta-sheet of 5 strands, order 32145; incomplete Rossmann-like fold; binds UDP group    |
| 270 | d.142      | 20    | 0.482    | 0.516     | ATP-grasp                                                              | Consists of two subdomains with different alpha+beta folds                                                        |
| 271 | d.143      | 3     | 0.333    | 0.333     | SAICAR synthase-like                                                   | consists of two alpha+beta subdomains                                                                             |
| 272 | d.144      | 26    | 0.751    | 0.886     | Protein kinase-like (PK-like)                                          | consists of two alpha+beta domains, C-terminal domain is mostly alpha helical                                     |
| 273 | d.104      | 15    | 0.810    | 0.900     | Class II aaRS and biotin synthetases                                   | contains large mixed beta-sheet                                                                                   |
| 274 | d.122      | 11    | 0.709    | 0.845     | ATPase domain of HSP90 chaperone/DNA topoisomerase II/histidine kinase | 8 stranded mixed beta-sheet; 2 layers: alpha/beta                                                                 |
| 275 | d.14       | 16    | 0.633    | 0.738     | Ribosomal protein S5 domain 2-like                                     | core: beta(3)-alpha-beta-alpha; 2 layers: alpha/beta; left-handed crossover                                       |
| 276 | d.87       | 13    | 0.615    | 0.583     | CO dehydrogenase flavoprotein C-domain-like                            | core: beta(3,4)-alpha(3); alpha+beta sandwich                                                                     |
| 277 | d.153      | 25    | 0.687    | 0.788     | Ntn hydrolase-like                                                     | 4 layers: alpha/beta/beta/alpha; has an unusual sheet-to-sheet packing                                            |
| 278 | d.166      | 10    | 0.400    | 0.422     | ADP-ribosylation                                                       | unusual fold                                                                                                      |
| 279 | d.184      | 2     | 0.000    | 0.000     | Non-globular alpha+beta subunits of globular proteins                  | (                                                                                                                 |
| 280 | d.4        | 4     | 0.000    | 0.250     | His-Me finger endonucleases                                            | core: (alpha)-beta-omega_loop-beta-alpha; embeded in larger different structures                                  |
| 281 | d.3        | 20    | 0.179    | 0.368     | Cysteine proteinases                                                   | consists of one alpha-helix and 4 strands of antiparallel beta-sheet and contains the catalytic triad Cys-His-Asn |
| 282 | d.92       | 24    | 0.259    | 0.359     | Zincin-like                                                            | contains mixed beta sheet with connection over free side of the sheet                                             |

Table 3. True Positive Rates at 1% False Positive Rate, for VAST and SHEBA, for 468 SCOP Folds in the order of the Heat Map.

| $i$ | Class Fold | $N_i$ | TPR VAST | TPR SHEBA | Fold Name                                                             | Fold Description                                                                                                                                            |
|-----|------------|-------|----------|-----------|-----------------------------------------------------------------------|-------------------------------------------------------------------------------------------------------------------------------------------------------------|
| 283 | d.170      | 2     | 0.000    | 0.500     | SRCR-like                                                             | unusual fold; disulphide-rich; core: beta-x-alpha-beta-loop-beta                                                                                            |
| 284 | d.26       | 18    | 0.333    | 0.438     | FKBP-like                                                             | core: beta(2)-alpha-beta(2); antiparallel beta-sheet                                                                                                        |
| 285 | d.78       | 2     | 0.000    | 0.000     | RPB5-like RNA polymerase subunit                                      | core: beta-alpha-beta-alpha-beta(2); 2 layers, alpha/beta                                                                                                   |
| 286 | d.2        | 12    | 0.152    | 0.614     | Lysozyme-like                                                         | common alpha+beta motif for the active site region                                                                                                          |
| 287 | d.79       | 15    | 0.624    | 0.552     | Bacillus chorismate mutase-like                                       | core: beta-alpha-beta-alpha-beta(2); mixed beta-sheet: order 1423, strand 4 is antiparallel to the rest                                                     |
| 288 | d.81       | 15    | 0.267    | 0.490     | Glyceraldehyde-3-phosphate dehydrogenase-like, C-terminal domain      | core: alpha-beta-alpha-beta(3); mixed sheet: 2134, strand 2 is parallel to strand 1                                                                         |
| 289 | d.169      | 24    | 0.730    | 0.797     | C-type lectin-like                                                    | unusual fold                                                                                                                                                |
| 290 | d.32       | 14    | 0.473    | 0.907     | Glyoxalase/Bleomycin resistance protein/Dihydroxybiphenyl dioxygenase | beta-alpha-beta(3); 2 layers: alpha/beta                                                                                                                    |
| 291 | d.110      | 18    | 0.611    | 0.637     | Profilin-like                                                         | core: 2 alpha-helices and 5-stranded antiparallel sheet: order 21543; 3 layers: alpha/beta/alpha                                                            |
| 292 | d.17       | 24    | 0.522    | 0.685     | Cystatin-like                                                         | Core: alpha-beta(4); helix packs against coiled antiparallel beta-sheet                                                                                     |
| 293 | d.211      | 12    | 0.697    | 0.697     | beta-hairpin-alpha-hairpin repeat                                     | multiple repeats of beta(2)-alpha(2) motif                                                                                                                  |
| 294 | d.163      | 7     | 0.571    | 0.976     | DNA breaking-rejoining enzymes                                        | core: alpha3-beta3-alpha4; one side of beta-sheet is exposed                                                                                                |
| 295 | d.210      | 2     | 1.000    | 1.000     | Argininosuccinate synthetase, C-terminal domain                       | unusual fold                                                                                                                                                |
| 296 | d.133      | 3     | 1.000    | 1.000     | Molybdenum cofactor-binding domain                                    | beta(2)-alpha-beta-alpha-beta; 2 layers: a/b; mixed sheet: order 1243: crossing loops                                                                       |
| 297 | d.113      | 6     | 0.800    | 1.000     | Nudix                                                                 | beta(2)-alpha-beta(3)-alpha; 3 layers: alpha/beta/alpha; mixed sheet                                                                                        |
| 298 | d.161      | 3     | 1.000    | 1.000     | ADC synthase                                                          | duplication: contains four repeats of alpha-beta(2)-beta motif arranged in a 4 layer core structure: alpha/beta/beta/alpha; orthogonally packed beta-sheets |
| 299 | d.177      | 3     | 1.000    | 1.000     | FAH                                                                   | unusual fold; contains 3 layers of beta-sheet structure                                                                                                     |
| 300 | d.145      | 8     | 1.000    | 1.000     | FAD-binding domain                                                    | consists of two alpha+beta subdomains                                                                                                                       |
| 301 | d.171      | 3     | 1.000    | 1.000     | Fibrinogen C-terminal domain-like                                     | unusual fold                                                                                                                                                |
| 302 | d.167      | 3     | 1.000    | 1.000     | Peptide deformylase                                                   | alpha-beta(5)-alpha; 3 layers: a/b/a; meander beta-sheet wraps around the C-terminal alpha-helix                                                            |
| 303 | d.174      | 2     | 1.000    | 1.000     | Nitric oxide (NO) synthase oxygenase domain                           | unusual fold                                                                                                                                                |
| 304 | d.124      | 6     | 1.000    | 1.000     | Ribonuclease Rh-like                                                  | alpha+beta fold                                                                                                                                             |

Table 3. True Positive Rates at 1% False Positive Rate, for VAST and SHEBA, for 468 SCOP Folds in the order of the Heat Map.

| $i$ | Class Fold | $N_i$ | TPR VAST | TPR SHEBA | Fold Name                                                                 | Fold Description                                                                                                                                                             |
|-----|------------|-------|----------|-----------|---------------------------------------------------------------------------|------------------------------------------------------------------------------------------------------------------------------------------------------------------------------|
| 305 | d.162      | 11    | 1.000    | 1.000     | Lactate & malate dehydrogenases, C-terminal domain                        | unusual fold, defines family                                                                                                                                                 |
| 306 | d.185      | 13    | 0.718    | 0.981     | LuxS/MPP-like metallohydrolase                                            | core: beta-alpha-beta(2)-alpha(2); 2 layers: alpha/beta                                                                                                                      |
| 307 | d.115      | 4     | 1.000    | 1.000     | YrdC/RibB                                                                 | core: alpha-beta(2)-alpha-beta-alpha(2)-beta(2)-alpha-beta-alpha-beta; 3 layers; mixed twisted sheet of 7 strands; order 7126354; strands 7 and 1 are parallel to each other |
| 308 | d.165      | 7     | 1.000    | 1.000     | Ribosome inactivating proteins (RIP)                                      | contains mixed beta-sheet                                                                                                                                                    |
| 309 | d.136      | 5     | 0.800    | 0.950     | Phospholipase D/nuclease                                                  | beta-alpha-beta-alpha-beta-alpha-beta(4)-alpha; mixed sheet: order 1765234                                                                                                   |
| 310 | d.157      | 7     | 1.000    | 1.000     | Metallo-hydrolase/oxidoreductase                                          | duplication of beta(4)-alpha-beta-alpha motif; 4 layers a/b/b/a; mixed beta-sheets                                                                                           |
| 311 | d.108      | 15    | 0.790    | 0.876     | Acyl-CoA N-acyltransferases (Nat)                                         | 3 layers: a/b/a; contains mixed beta-sheet                                                                                                                                   |
| 312 | d.109      | 14    | 0.621    | 0.934     | Gelsolin-like                                                             | 3 layers: a/b/a; contains mixed beta-sheet                                                                                                                                   |
| 313 | d.117      | 3     | 1.000    | 1.000     | Thymidylate synthase/dCMP hydroxymethylase                                | contains large mixed beta-sheet                                                                                                                                              |
| 314 | d.168      | 4     | 0.833    | 1.000     | Succinate dehydrogenase/fumarate reductase flavoprotein, catalytic domain | unusual fold                                                                                                                                                                 |
| 315 | d.73       | 2     | 1.000    | 1.000     | RuBisCO, small subunit                                                    | alpha-beta(2)-alpha-beta(2); 2 layers, alpha/beta                                                                                                                            |
| 316 | d.131      | 13    | 1.000    | 1.000     | DNA clamp                                                                 | contains two helices and two beta sheets                                                                                                                                     |
| 317 | d.44       | 3     | 0.667    | 1.000     | Fe,Mn superoxide dismutase (SOD), C-terminal domain                       | alpha-beta(2)-alpha-beta-alpha(2); 3 strands of antiparallel sheet: 213                                                                                                      |
| 318 | d.118      | 2     | 0.000    | 1.000     | N-acetylmuramoyl-L-alanine amidase-like                                   | contains mixed beta-sheet                                                                                                                                                    |
| 319 | d.126      | 5     | 0.900    | 1.000     | Pentelin, beta/alpha-propeller                                            | duplication: composed of 5 alpha-beta(2)-alpha-beta units arranged around pseudo fivefold axis                                                                               |
| 320 | d.106      | 2     | 1.000    | 1.000     | Sterol carrier protein, SCP                                               | alpha-beta(3)-(crossover)-beta-(alpha)-beta; 3 layers: a/b/a; antiparallel beta-sheet of 5 strands; order 32145                                                              |
| 321 | d.137      | 3     | 0.333    | 0.833     | Monooxygenase (hydroxylase) regulatory protein                            | corner-like structure formed by two sheets and filled in with 2-3 helices                                                                                                    |
| 322 | d.75       | 3     | 1.000    | 0.667     | MutS N-terminal domain-like                                               | beta(2)-alpha-beta(2)-alpha; 2 layers, alpha/beta                                                                                                                            |
| 323 | d.77       | 2     | 1.000    | 1.000     | Ribosomal protein L5                                                      | beta-alpha-beta(2)-alpha-beta(3)-alpha; 2 layers, alpha/beta; antiparallel beta-sheet: order 231654                                                                          |
| 324 | d.175      | 2     | 0.000    | 1.000     | Penicillin binding protein dimerisation domain                            | unusual fold                                                                                                                                                                 |

Table 3. True Positive Rates at 1% False Positive Rate, for VAST and SHEBA, for 468 SCOP Folds in the order of the Heat Map.

| $i$ | Class Fold | $N_i$ | TPR VAST | TPR SHEBA | Fold Name                                                                                     | Fold Description                                                                                        |
|-----|------------|-------|----------|-----------|-----------------------------------------------------------------------------------------------|---------------------------------------------------------------------------------------------------------|
| 325 | d.225      | 2     | 1.000    | 1.000     | Multidrug efflux transporter AcrB TolC docking domain; DN and DC subdomains                   | Intertwined pseudo hexamer of an alpha+beta motif                                                       |
| 326 | d.112      | 3     | 1.000    | 1.000     | Phosphotransferase/anion transport protein                                                    | beta-alpha(2)-beta(3)-alpha(3); 3 layers, alpha/beta/alpha; mixed sheet: order 1342; loop crossing      |
| 327 | d.178      | 2     | 1.000    | 1.000     | Aromatic aminoacid monooxygenases, catalytic and oligomerization domains                      | unusual fold                                                                                            |
| 328 | d.15       | 56    | 0.535    | 0.775     | beta-Grasp (ubiquitin-like)                                                                   | core: beta(2)-alpha-beta(2); mixed beta-sheet 2143                                                      |
| 329 | d.66       | 5     | 0.550    | 0.850     | Alpha-L RNA-binding motif                                                                     | alpha(2)-beta(2)-loop-beta; 2 layers: alpha/beta                                                        |
| 330 | d.120      | 4     | 1.000    | 1.000     | Cytochrome b5                                                                                 | small, heme-binding fold                                                                                |
| 331 | d.42       | 6     | 0.867    | 1.000     | POZ domain                                                                                    | core: beta(2)-alpha(2)-beta(2)-alpha(2); 2 layers a/b; mixed sheet: 2143                                |
| 332 | d.189      | 3     | 0.333    | 1.000     | PX domain                                                                                     | beta(3)-alpha(4); meander beta-sheet packed against array of helices; contains Pro-rich stretch         |
| 333 | d.201      | 3     | 1.000    | 1.000     | SRP19                                                                                         | beta-alpha-beta(2)-alpha; 2 layers: alpha/beta                                                          |
| 334 | d.1        | 5     | 0.400    | 1.000     | Microbial ribonucleases                                                                       | single helix packs against antiparallel beta-sheet                                                      |
| 335 | d.24       | 3     | 0.833    | 1.000     | Pilin                                                                                         | contains very long N-terminal helix, which end is packed against beta-sheet                             |
| 336 | d.127      | 5     | 1.000    | 1.000     | Creatinase/aminopeptidase                                                                     | duplication: composed of two very similar alpha+beta folds                                              |
| 337 | d.21       | 2     | 1.000    | 1.000     | Diaminopimelate epimerase                                                                     | mixed beta-sheet folds into a barrel (n=8, S=14) around the central helix                               |
| 338 | d.5        | 4     | 1.000    | 1.000     | RNase A-like                                                                                  | contains long curved beta-sheet and 3 helices                                                           |
| 339 | d.93       | 15    | 0.738    | 1.000     | SH2-like                                                                                      | 3 layers: a/b/a; antiparallel beta-sheet of 5 strands is flaked by two helices                          |
| 340 | d.88       | 2     | 0.000    | 1.000     | SRF-like                                                                                      | alpha-beta(2)-alpha; dimer; 3 layers a/b/a; antiparallel beta-sheet                                     |
| 341 | d.18       | 2     | 0.000    | 0.000     | ssDNA-binding transcriptional regulator domain                                                | helix-swapped dimer of beta(4)-alpha motifs                                                             |
| 342 | d.85       | 3     | 0.667    | 1.000     | RNA bacteriophage capsid protein                                                              | 6-standed beta-sheet followed with 2 helices; meander                                                   |
| 343 | d.217      | 2     | 1.000    | 1.000     | SAND domain-like                                                                              | core: three short helices packed against a barrel-like beta-sheet; some similarity to the SH3-like fold |
| 344 | d.9        | 17    | 0.592    | 0.904     | IL8-like                                                                                      | beta(3)-alpha                                                                                           |
| 345 | d.101      | 2     | 0.000    | 1.000     | Polynucleotide phosphorylase/guanosine pentaphosphate synthase (PNPase/GPSI), domains 2 and 5 | beta(2)-alpha-beta(2)-alpha; 3 layers: alpha/beta/alpha; antiparallel sheet: order 2134                 |
| 346 | d.19       | 15    | 0.881    | 0.971     | MHC antigen-recognition domain                                                                | dimeric                                                                                                 |

Table 3. True Positive Rates at 1% False Positive Rate, for VAST and SHEBA, for 468 SCOP Folds in the order of the Heat Map.

| $i$ | Class Fold | $N_i$ | TPR VAST | TPR SHEBA | Fold Name                                              | Fold Description                                                                                                             |
|-----|------------|-------|----------|-----------|--------------------------------------------------------|------------------------------------------------------------------------------------------------------------------------------|
| 347 | d.83       | 2     | 0.000    | 1.000     | Bactericidal permeability-increasing protein, BPI      | beta-alpha-beta(5)-alpha-beta2; 2 layers: alpha/beta; antiparallel sheet                                                     |
| 348 | d.128      | 3     | 0.333    | 1.000     | Glutamine synthase/guanido kinase                      |                                                                                                                              |
| 349 | d.179      | 2     | 1.000    | 1.000     | Substrate-binding domain of HMG-CoA reductase          | unusual fold                                                                                                                 |
| 350 | d.198      | 7     | 0.548    | 0.881     | Secretion chaperone-like                               | alpha-beta(3)-alpha-beta(2)-alpha; 2 layers: alpha/beta                                                                      |
| 351 | d.100      | 2     | 1.000    | 1.000     | L9 N-domain-like                                       | beta(2)-alpha-beta-alpha; 3 layers: alpha/beta/alpha                                                                         |
| 352 | d.13       | 5     | 0.800    | 0.900     | HIT-like                                               | alpha-beta(3)-alpha-beta(2); 3 layers: alpha/beta/alpha                                                                      |
| 353 | d.173      | 2     | 1.000    | 1.000     | Methionine synthase activation domain-like             | unusual fold; core: beta-alpha(2)-beta(2)-alpha(2)-beta-alpha-beta; antiparallel beta-sheet: order 12354                     |
| 354 | d.90       | 4     | 1.000    | 1.000     | NADH oxidase/flavin reductase                          | core: (alpha-beta-alpha-beta)2; 3 layers a/b/a; antiparallel beta-sheet: 1243                                                |
| 355 | d.6        | 2     | 0.000    | 1.000     | Prion-like                                             | beta-alpha-beta-alpha(2); antiparallel beta-ribbon                                                                           |
| 356 | d.202      | 2     | 1.000    | 1.000     | Transcription factor NusA, N-terminal domain           | alpha-beta(3)-alpha-beta-alpha; bifurcated coiled beta-sheet                                                                 |
| 357 | d.218      | 6     | 0.733    | 1.000     | Nucleotidyltransferase                                 | core: alpha-beta-turn-beta-X-beta-(alpha); mixed beta-sheet, order 123                                                       |
| 358 | d.89       | 4     | 1.000    | 0.917     | Origin of replication-binding domain, RBD-like         | alpha-beta-alpha-beta(2)-alpha-beta-alpha-beta; 3 layers:a/b/a; antiparallel sheet 41325                                     |
| 359 | d.65       | 2     | 1.000    | 1.000     | Hedgehog/DD-pepidase                                   | alpha-beta(2)-alpha-beta(2); 2 layers: alpha/beta                                                                            |
| 360 | d.67       | 5     | 0.500    | 0.250     | RRF/tRNA synthetase additional domain-like             | core:alpha-beta(2)-alpha-beta(2); 2 layers: alpha/beta                                                                       |
| 361 | d.181      | 2     | 1.000    | 1.000     | Insert subdomain of RNA polymerase alpha subunit       | unusual fold; contains a left-handed beta-alpha-beta unit                                                                    |
| 362 | d.212      | 3     | 0.333    | 0.333     | TolA/TonB C-terminal domain                            | beta(2)-alpha-beta; 2 layers, alpha/beta; left-handed beta-alpha-beta unit in unswapped monomer                              |
| 363 | d.31       | 4     | 0.333    | 1.000     | Cdc48 domain 2-like                                    | beta-alpha-beta(3); 2 layers: alpha/beta                                                                                     |
| 364 | d.43       | 3     | 1.000    | 0.667     | Elongation factor Ts (EF-Ts), dimerisation domain      | beta(2)-alpha(n)-beta; 2 layers a/b; antiparallel sheet: 123                                                                 |
| 365 | d.96       | 7     | 1.000    | 1.000     | T-fold                                                 | beta(2)-alpha(2)-beta(2); 2 layers: alpha/beta; antiparallel sheet 1234                                                      |
| 366 | d.59       | 2     | 1.000    | 1.000     | Ribosomal protein L30p/L7e                             | core: beta-alpha-beta-alpha-beta; antiparallel beta-sheet: order 312; some similarity with the ferredoxin-like fold          |
| 367 | d.10       | 5     | 0.600    | 0.450     | DNA-binding domain                                     | beta(3)-alpha; 2 layers: alpha/beta                                                                                          |
| 368 | d.50       | 9     | 0.611    | 0.778     | dsRBD-like                                             | alpha-beta(3)-alpha; 2 layers: alpha/beta                                                                                    |
| 369 | d.134      | 2     | 1.000    | 1.000     | Sulfite reductase hemoprotein (SiRHP), domains 2 and 4 | beta-alpha-beta-alpha-beta(3)-alpha(2,3); mixed sheet: order 12345; left-handed crossover connection between strands 2 and 3 |
| 370 | d.20       | 8     | 0.857    | 1.000     | UBC-like                                               | alpha-beta(4)-alpha(3); core: meander beta-sheet plus one helix 2                                                            |
| 371 | d.82       | 3     | 0.667    | 0.333     | N domain of copper amine oxidase-like                  | alpha-beta(5)-alpha; 2 layers: alpha/beta; meander antiparallel sheet                                                        |



Table 3. True Positive Rates at 1% False Positive Rate, for VAST and SHEBA, for 468 SCOP Folds in the order of the Heat Map.

| $i$ | Class Fold | $N_i$ | TPR VAST | TPR SHEBA | Fold Name                                                                           | Fold Description                                                                                                               |
|-----|------------|-------|----------|-----------|-------------------------------------------------------------------------------------|--------------------------------------------------------------------------------------------------------------------------------|
| 372 | d.111      | 2     | 1.000    | 1.000     | PR-1-like                                                                           | alpha-beta-alpha-beta-alpha(2)-beta(2); 3 layers, alpha/beta/alpha; mixed sheet: order 1342                                    |
| 373 | d.208      | 2     | 1.000    | 1.000     | MTH1598-like                                                                        | beta(2)-alpha-beta-alpha-beta(4); 3 layers: beta/alpha/beta; some similarity to the Hsp33 fold                                 |
| 374 | d.60       | 3     | 1.000    | 1.000     | Probable bacterial effector-binding domain                                          | duplication of beta-alpha-beta(2) motif: antiparallel beta sheet forms barrel (n=6, S=12)                                      |
| 375 | d.140      | 2     | 1.000    | 1.000     | Ribosomal protein S8                                                                | consists of 2 different alpha+beta subdomains arranged in a 4-layer structure: b/a/b/a                                         |
| 376 | d.68       | 10    | 0.422    | 0.611     | IF3-like                                                                            | beta-alpha-beta-alpha-beta(2); 2 layers; mixed sheet 1243, strand 4 is antiparallel to the rest                                |
| 377 | d.150      | 3     | 1.000    | 1.000     | 4'-phosphopantetheinyl transferase                                                  | beta-alpha(3)-beta(2) motif                                                                                                    |
| 378 | d.22       | 3     | 1.000    | 1.000     | GFP-like                                                                            | beta-sheet folds into a barrel (n=11, S=14) around the central helix                                                           |
| 379 | d.38       | 5     | 0.600    | 1.000     | Thioesterase/thiol ester dehydrase-isomerase                                        | core: beta-alpha-beta(4); 2 layers: alpha/beta                                                                                 |
| 380 | d.129      | 14    | 0.560    | 0.588     | TBP-like                                                                            | beta-alpha-beta(4)-alpha                                                                                                       |
| 381 | d.16       | 14    | 0.418    | 0.753     | FAD-linked reductases, C-terminal domain                                            | alpha+beta sandwich                                                                                                            |
| 382 | d.41       | 10    | 0.711    | 0.800     | alpha/beta-Hammerhead                                                               | core: beta-BETA-alpha-beta-BETA-beta-alpha; contains a beta-hammerhead motif similar to that in barrel-sandwich hybrids        |
| 383 | d.146      | 2     | 1.000    | 1.000     | Uridine diphospho-N-Acetylenolpyruvylglucosamine reductase, MurB, C-terminal domain | consists of two alpha+beta subdomains                                                                                          |
| 384 | d.86       | 2     | 1.000    | 1.000     | Translation initiation factor eIF4e                                                 | beta(2)-alpha-beta(2)-alpha-beta(2)-alpha-beta-2; 2 layers: alpha/beta; antiparallel sheet: 21356478                           |
| 385 | d.151      | 4     | 1.000    | 1.000     | DNase I-like                                                                        | contains beta-sandwich; duplication of alpha+beta motif                                                                        |
| 386 | d.160      | 3     | 1.000    | 1.000     | Nitrilase/N-carbamoyl-D-aminoacid amidohydrolase                                    | 4 layers: alpha/beta/beta/alpha; mixed beta sheets; contains duplication                                                       |
| 387 | d.159      | 8     | 0.643    | 0.982     | Metallo-dependent phosphatases                                                      | 4 layers: alpha/beta/beta/alpha; mixed beta sheets; contains duplication                                                       |
| 388 | d.12       | 2     | 0.000    | 0.500     | Ribosomal proteins L23 and L15e                                                     | beta-(alpha)-beta-alpha-beta(2); 3 layers: alpha/beta/alpha; antiparallel beta-sheet: order 1243                               |
| 389 | d.95       | 8     | 0.679    | 0.946     | Homing endonuclease-like                                                            | alpha-beta(2)-alpha-beta(2)-alpha; 2 layers: a/b; antiparallel sheet 1243                                                      |
| 390 | d.206      | 2     | 1.000    | 1.000     | YggU-like                                                                           | beta(2)-loop-alpha-beta(2)-alpha; 2 layers: a/b; antiparallel sheet 1243; some similarity to the Homing endonuclease-like fold |
| 391 | d.64       | 2     | 1.000    | 1.000     | eIF1-like                                                                           | beta(2)-alpha-beta(2)-alpha-beta; 2 layers: alpha/beta; mixed beta-sheet: order 51243                                          |

Table 3. True Positive Rates at 1% False Positive Rate, for VAST and SHEBA, for 468 SCOP Folds in the order of the Heat Map.

| $i$ | Class Fold | $N_i$ | TPR VAST | TPR SHEBA | Fold Name                                                        | Fold Description                                                                                                |
|-----|------------|-------|----------|-----------|------------------------------------------------------------------|-----------------------------------------------------------------------------------------------------------------|
| 392 | d.54       | 8     | 0.964    | 1.000     | Enolase N-terminal domain-like                                   | beta(3)-alpha(3); meander and up-and-down bundle                                                                |
| 393 | d.55       | 2     | 1.000    | 1.000     | Ribosomal protein L22                                            | beta-alpha(3)-beta(2); 2 layers: alpha/beta; related to the enolase/MLE N-domain fold by a circular permutation |
| 394 | d.11       | 2     | 1.000    | 1.000     | Penicillin-binding protein 2x (pbp-2x), c-terminal domain        | alpha1-beta3; 2 layers: alpha/beta; order 132                                                                   |
| 395 | d.40       | 3     | 1.000    | 1.000     | CI-2 family of serine protease inhibitors                        | alpha+beta sandwich; loop across free side of beta-sheet                                                        |
| 396 | d.37       | 3     | 0.667    | 1.000     | CBS-domain                                                       | core: beta-alpha-beta(4); 2 layers: alpha/beta                                                                  |
| 397 | d.130      | 3     | 0.667    | 1.000     | S-adenosylmethionine synthetase                                  | duplication: consists of 3 similar intertwined domains                                                          |
| 398 | d.80       | 6     | 0.600    | 0.967     | Tautomerase/MIF                                                  | (beta-alpha-beta)2; 2 layers: alpha/beta; mixed beta-sheet                                                      |
| 399 | d.52       | 10    | 0.622    | 0.833     | Alpha-lytic protease prodomain-like                              | core: alpha-beta(2)-(alpha)-beta; 2 layers: alpha/beta                                                          |
| 400 | d.49       | 2     | 1.000    | 1.000     | Signal recognition particle alu RNA binding heterodimer, SRP9/14 | (beta)-alpha-beta(3)-alpha; 2 layers, alpha/beta                                                                |
| 401 | d.56       | 2     | 1.000    | 1.000     | GroEL-intermediate domain like                                   | 3-helical bundle packed against 3-stranded mixed beta-sheet                                                     |
| 402 | d.105      | 2     | 1.000    | 1.000     | Clathrin adaptor appendage domain                                | beta-alpha-beta-alpha-beta(4)-alpha; 3 layers: a/b/a; bifurcated antiparallel beta-sheet                        |
| 403 | d.141      | 4     | 1.000    | 1.000     | Ribosomal protein L6                                             | consists of two beta-sheets and one alpha-helix packed around single core                                       |
| 404 | d.94       | 4     | 1.000    | 1.000     | HPr-like                                                         | beta-alpha-beta(2)-alpha-beta-alpha; 2 layers: a/b; antiparallel sheet 1423                                     |
| 405 | d.51       | 7     | 1.000    | 1.000     | Eukaryotic type KH-domain (eKH-domain)                           | beta-alpha(2)-beta(2)-alpha; 2 layers: alpha/beta                                                               |
| 406 | d.58       | 133   | 0.530    | 0.512     | Ferredoxin-like                                                  | alpha+beta sandwich with antiparallel beta-sheet; (beta-alpha-beta)x2                                           |
| 407 | d.74       | 8     | 0.679    | 0.750     | DCoH-like                                                        | beta(2)-alpha-beta(2)-alpha; 2 layers, alpha/beta                                                               |
| 408 | d.45       | 2     | 1.000    | 1.000     | ClpS-like                                                        | beta-alpha(2)-beta-alpha-beta; 2 layers, alpha/beta                                                             |
| 409 | e.26       | 3     | 0.333    | 0.333     | Prismane protein-like                                            | 3 domains: (1) spectrin repeat-like 3-helical bundle; (2 and 3) alpha/beta: Rossmann-fold topology              |
| 410 | e.8        | 14    | 0.077    | 0.297     | DNA/RNA polymerases                                              | (                                                                                                               |
| 411 | e.23       | 3     | 1.000    | 1.000     | Firefly luciferase-like                                          | 4 domains: (1&2) duplication: share the same alpha/beta fold; (3) beta-barrel; (4) alpha+beta                   |
| 412 | e.5        | 3     | 1.000    | 1.000     | Heme-linked catalases                                            | contains an (8,10) beta-barrel and an all-alpha domain                                                          |
| 413 | e.11       | 2     | 1.000    | 1.000     | Type II DNA topoisomerase                                        | 4 domains: (1) toprim alpha/beta; (2) "winged helix"-like; (3) alpha+beta; (4) all-alpha                        |

Table 3. True Positive Rates at 1% False Positive Rate, for VAST and SHEBA, for 468 SCOP Folds in the order of the Heat Map.

| <i>i</i> | Class Fold | $N_i$ | TPR VAST | TPR SHEBA | Fold Name                                                  | Fold Description                                                                                                                           |
|----------|------------|-------|----------|-----------|------------------------------------------------------------|--------------------------------------------------------------------------------------------------------------------------------------------|
| 414      | e.25       | 2     | 1.000    | 1.000     | Sec1/munc18-like (SM) proteins                             | 3 domains: (1 and 2) alpha+beta; (3) mostly alpha, inserted in domain 2                                                                    |
| 415      | e.3        | 14    | 1.000    | 1.000     | beta-Lactamase/D-ala carboxypeptidase                      | contains a cluster of helices and an alpha+beta sandwich                                                                                   |
| 416      | e.10       | 3     | 1.000    | 1.000     | Prokaryotic type I DNA topoisomerase                       | 4 domains: (1) Toprim alpha/beta; (2&4) "winged helix"-like; (3) barrel: n=6, S=8                                                          |
| 417      | e.1        | 6     | 1.000    | 1.000     | Serpins                                                    | contains a cluster of helices and a beta-sandwich                                                                                          |
| 418      | e.6        | 5     | 1.000    | 1.000     | Acyl-CoA dehydrogenase NM domain-like                      | 2 domains: (1) all-alpha: 5 helices; (2) contains an open beta-sheet barrel: n*=5, S*=8; complex topology                                  |
| 419      | e.18       | 2     | 1.000    | 1.000     | Nickel-iron hydrogenase, large subunit                     | 3 domains: (1) all-alpha; (2&3) alpha+beta                                                                                                 |
| 420      | e.4        | 2     | 1.000    | 1.000     | ADP ribosyl cyclase-like                                   | contains a cluster of helices and an alpha/beta domain                                                                                     |
| 421      | e.24       | 3     | 0.667    | 1.000     | Ribosomal protein L1                                       | 2 domains: (1) alpha+beta; (2) alpha/beta (interrupts domain 1)                                                                            |
| 422      | e.17       | 4     | 1.000    | 1.000     | D-aminoacid aminotransferase-like PLP-dependent enzymes    | 2 domains: (1) alpha+beta: beta3-alpha2-beta2; (2) alpha/beta, a part of its mixed sheet forms barrel: n=6, S=8                            |
| 423      | e.39       | 2     | 1.000    | 1.000     | YebC-like                                                  | 3 domains: (1) 3-helical bundle; (2 and 3 ) alpha+beta of different folds: domain 3 has a ferredoxin-like fold and is inserted in domain 2 |
| 424      | e.7        | 7     | 1.000    | 1.000     | Sugar phosphatases                                         | N-terminal domain is an alpha+beta, C-terminal domain is an alpha/beta with mixed beta-sheet                                               |
| 425      | e.31       | 2     | 1.000    | 1.000     | Ku heterodimer subunits                                    | 3 domains: (1) integrin A-like alpha/beta; (2) beta-barrel (n=7, s=10); (3) helical arm with an HTH motif                                  |
| 426      | e.22       | 3     | 1.000    | 1.000     | Dehydroquinase synthase-like                               | 2 domains: (1) alpha/beta of a Rossmann-fold topology, binds NAD (2) multihelical array                                                    |
| 427      | f.4        | 14    | 0.192    | 0.654     | Transmembrane beta-barrels                                 | not a true fold, gathers together transmembrane barrels of different (n,S)                                                                 |
| 428      | f.7        | 3     | 0.000    | 0.167     | Lipovitellin-phosvitin complex; beta-sheet shell regions   |                                                                                                                                            |
| 429      | f.1        | 11    | 0.145    | 0.182     | Toxins' membrane translocation domains                     | multi-helical domains of various folds which is thought to unfold in the membrane                                                          |
| 430      | f.23       | 5     | 0.000    | 0.500     | Single transmembrane helix                                 | not a true fold                                                                                                                            |
| 431      | f.21       | 7     | 0.143    | 0.619     | Heme-binding four-helical bundle                           | core: four transmembrane helices, up-and-down bundle, binds one or two heme groups in between the helices                                  |
| 432      | f.26       | 2     | 1.000    | 1.000     | Bacterial photosystem II reaction centre, L and M subunits | five transmembrane helices forming a sheet-like structure                                                                                  |
| 433      | f.19       | 2     | 1.000    | 1.000     | Aquaporin-like                                             | core: 8 helices, 2 short helices are surrounded by 6 long transmembrane helices                                                            |
| 434      | f.10       | 2     | 0.000    | 1.000     | Viral glycoprotein, central and dimerisation domains       | 2 intertwined domains; all-beta and alpha+beta                                                                                             |

Table 3. True Positive Rates at 1% False Positive Rate, for VAST and SHEBA, for 468 SCOP Folds in the order of the Heat Map.

| $i$ | Class Fold | $N_i$ | TPR VAST | TPR SHEBA | Fold Name                                                                           | Fold Description                                                                                                        |
|-----|------------|-------|----------|-----------|-------------------------------------------------------------------------------------|-------------------------------------------------------------------------------------------------------------------------|
| 435 | f.6        | 2     | 1.000    | 1.000     | Leukocidin (pore-forming toxin)                                                     | subunit fold contains beta-sandwich of Ig-like (grek-key) topology                                                      |
| 436 | f.35       | 2     | 1.000    | 1.000     | Multidrug efflux transporter AcrB transmembrane domain                              | 12 transmembrane helices; duplication: the N- and C-terminal halves of the whole proteins are structurally similar      |
| 437 | f.17       | 2     | 0.000    | 1.000     | Transmembrane helix hairpin                                                         | two antiparallel transmembrane helices                                                                                  |
| 438 | f.27       | 2     | 1.000    | 1.000     | 14 kDa protein of cytochrome bc1 complex (Ubiquinol-cytochrome c reductase)         | membrane-associated alpha-helical protein; no transmembrane helices                                                     |
| 439 | f.13       | 4     | 0.500    | 1.000     | Family A G protein-coupled receptor-like                                            | core: up-and-down bundle of seven transmembrane helices tilted 20 degrees with respect to the plane of the membrane     |
| 440 | f.24       | 3     | 1.000    | 1.000     | Cytochrome c oxidase subunit I-like                                                 | 12 transmembrane helices in an approximate threefold rotational symmetric arrangement                                   |
| 441 | f.25       | 2     | 1.000    | 1.000     | Cytochrome c oxidase subunit III-like                                               | core: 7 transmembrane helices organised into two bundles, one formed by the first two helices and the other by the rest |
| 442 | f.14       | 2     | 0.000    | 1.000     | Voltage-gated potassium channels                                                    | oligomeric transmembrane alpha-helical proteins                                                                         |
| 443 | f.28       | 2     | 1.000    | 1.000     | Nonheme 11 kDa protein of cytochrome bc1 complex (Ubiquinol-cytochrome c reductase) | membrane-associated alpha-helical protein; no transmembrane helices                                                     |
| 444 | g.39       | 12    | 0.152    | 0.636     | Glucocorticoid receptor-like (DNA-binding domain)                                   | alpha+beta metal(zinc)-bound fold                                                                                       |
| 445 | g.50       | 3     | 0.000    | 1.000     | FYVE/PHD zinc finger                                                                | dimetal(zinc)-bound alpha+beta fold                                                                                     |
| 446 | g.49       | 3     | 0.000    | 1.000     | Cysteine-rich domain                                                                | dimetal(zinc)-bound alpha+beta fold                                                                                     |
| 447 | g.44       | 7     | 0.429    | 1.000     | RING finger domain, C3HC4                                                           | dimetal(zinc)-bound alpha+beta motif; structurally diverse                                                              |
| 448 | g.37       | 5     | 0.400    | 1.000     | C2H2 and C2HC zinc fingers                                                          | alpha+beta metal(zinc)-bound fold: beta-hairpin + alpha-helix                                                           |
| 449 | g.10       | 3     | 1.000    | 1.000     | Hairpin loop containing domain-like                                                 | alpha+beta fold with two crossing loops                                                                                 |
| 450 | g.7        | 10    | 0.722    | 1.000     | Snake toxin-like                                                                    | disulphide-rich fold: nearly all-beta                                                                                   |
| 451 | g.8        | 9     | 0.944    | 1.000     | BPTI-like                                                                           | disulphide-rich alpha+beta fold                                                                                         |
| 452 | g.14       | 5     | 0.100    | 1.000     | Kringle-like                                                                        | disulphide-rich fold; nearly all-beta                                                                                   |
| 453 | g.15       | 10    | 0.633    | 0.767     | Ovomucoid/PCI-1 like inhibitors                                                     | disulphide-rich small alpha+beta fold                                                                                   |
| 454 | g.41       | 21    | 0.117    | 0.350     | Rubredoxin-like                                                                     | metal(zinc or iron)-bound fold; sequence contains two CX(n)C motifs, in most cases n = 2                                |
| 455 | g.38       | 2     | 0.000    | 1.000     | Zn2/Cys6 DNA-binding domain                                                         | all-alpha dimetal(zinc)-bound fold                                                                                      |
| 456 | g.17       | 12    | 0.129    | 0.902     | Cystine-knot cytokines                                                              | disulphide-rich fold; common core is all-beta                                                                           |
| 457 | g.35       | 4     | 0.500    | 1.000     | HIP (high potential iron protein)                                                   | folds around 4Fe-4S cluster                                                                                             |

Table 3. True Positive Rates at 1% False Positive Rate, for VAST and SHEBA, for 468 SCOP Folds in the order of the Heat Map.

| $i$ | Class Fold | $N_i$ | TPR VAST | TPR SHEBA | Fold Name                                                   | Fold Description                                                           |
|-----|------------|-------|----------|-----------|-------------------------------------------------------------|----------------------------------------------------------------------------|
| 458 | g.51       | 2     | 1.000    | 1.000     | Zn-binding domains of ADDBP                                 | metal(zinc)-bound alpha+beta fold                                          |
| 459 | g.52       | 4     | 1.000    | 1.000     | Inhibitor of apoptosis (IAP) repeat                         | metal(zinc)-bound alpha+beta fold                                          |
| 460 | g.53       | 2     | 0.000    | 1.000     | TAZ domain                                                  | all-alpha fold; Zn-binding sites are in the loops connecting helices       |
| 461 | g.22       | 3     | 0.000    | 1.000     | Serine protease inhibitors                                  | disulphide-rich; nearly all-beta                                           |
| 462 | g.24       | 5     | 0.000    | 0.900     | TNF receptor-like                                           | duplication: consists of three similar disulphide-rich domains             |
| 463 | g.9        | 9     | 0.361    | 0.889     | Defensin-like                                               | Disulphide-rich fold, nearly all-beta                                      |
| 464 | g.3        | 38    | 0.238    | 0.472     | Knottins (small inhibitors, toxins, lectins)                | disulphide-bound fold; contains beta-hairpin with two adjacent disulphides |
| 465 | g.18       | 16    | 0.563    | 0.992     | Complement control module/SCR domain                        | disulphide-rich all-beta fold                                              |
| 466 | g.27       | 5     | 0.900    | 1.000     | Fibronectin type I module                                   | disulphide-rich, all-beta                                                  |
| 467 | g.4        | 2     | 1.000    | 1.000     | PMP inhibitors                                              | disulphide-rich fold; all-beta: 3 antiparallel strands                     |
| 468 | g.59       | 2     | 0.000    | 0.500     | Zinc-binding domain of translation initiation factor 2 beta | zinc-bound beta-ribbon motif                                               |
